# Supplementary material for: The Genetic Architecture of Coordinately Evolving Male Wing Pigmentation and Courtship Behavior inDrosophila elegansandDrosophila gunungcola
Source: Oxford University Press journal article supplement (doi:10.1534/g3.114.013037), 2014-08-29
Supplement: 013037_013037si.pdf [file 013037_013037si.pdf]

**The genetic architecture of coordinately evolving male wing pigmentation and courtship behavior in *Drosophila elegans* and *D. gunungcola***

Shu-Dan Yeh and John R. True

Department of Ecology and Evolution, Stony Brook University, Stony Brook, NY 11794-5245, USA

Corresponding Author: John R. True Department of Ecology and Evolution, Stony Brook University, Stony Brook, NY 11794-5245, USA

e-mail: jrtrue@life.bio.sunysb.edu, phone: 631-379-7266

**DOI: 10.1534/g3.114.013037**

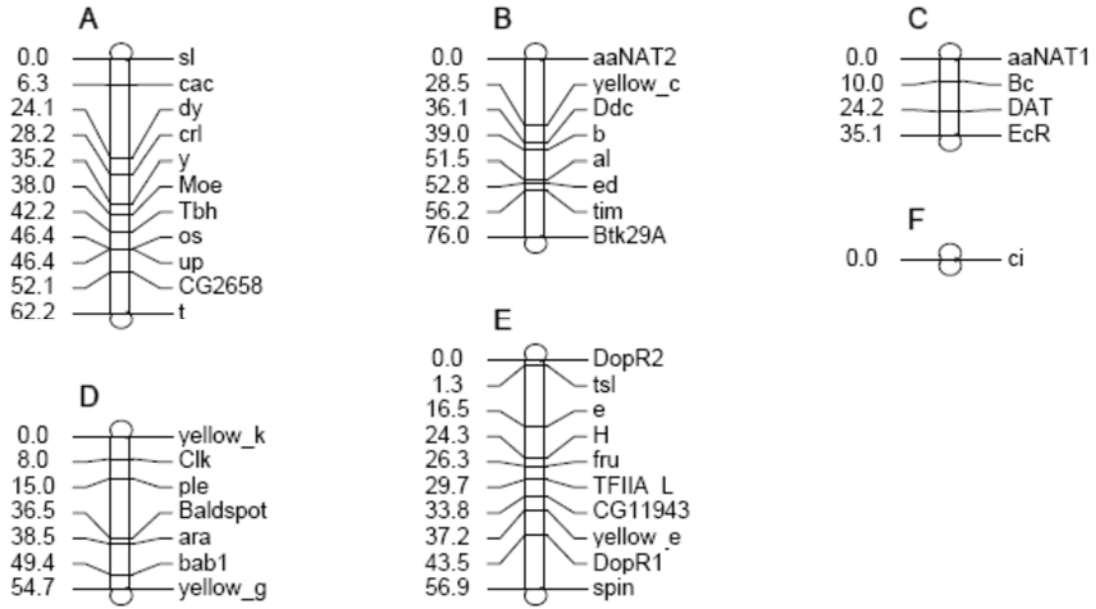

**Figure S1** The genetic linkage map obtained from the *e/e* backcross data set. Designations A through E correspond to Muller's elements.

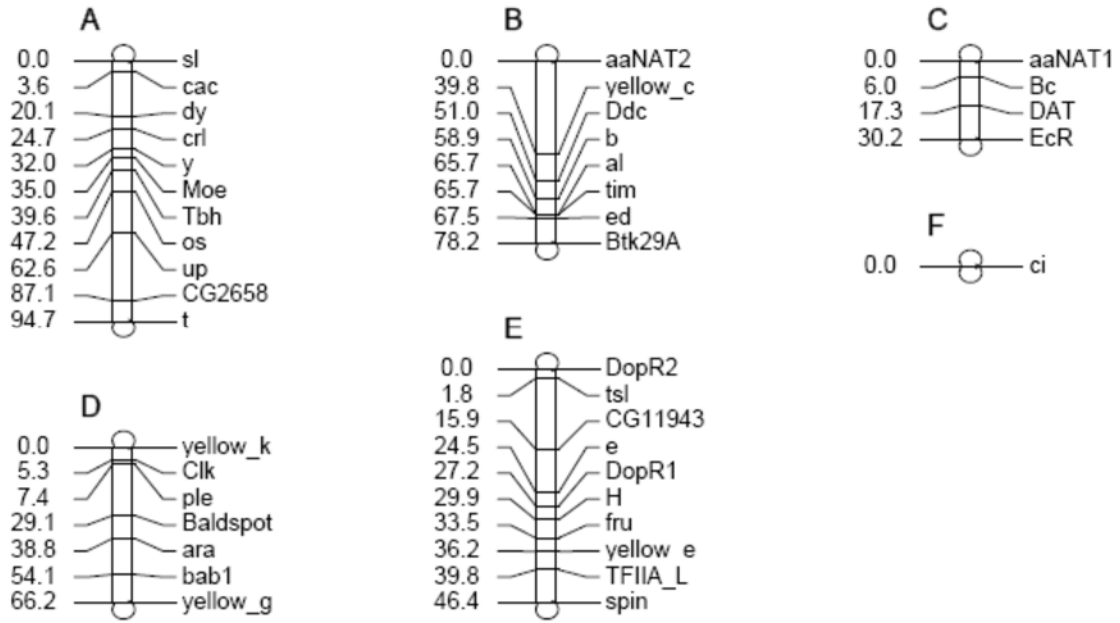

**Figure S2** The genetic linkage map obtained from the *gun* backcross set. Designations A through E correspond to Muller's elements.

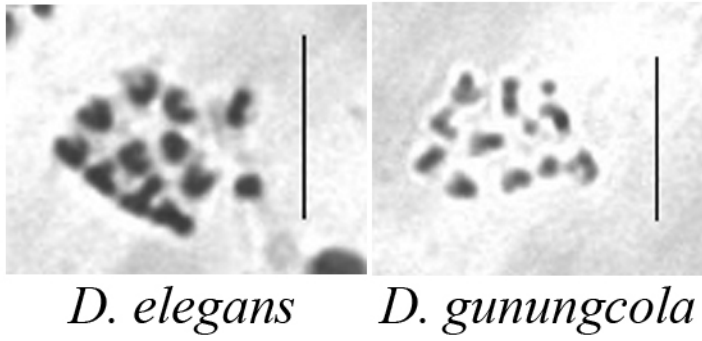

**Figure S3** Typical mitotic chromosome spreads of *D. elegans* and *D. gunungcola*. In the spreads above, clusters of 12 elements are clearly apparent. It is difficult to distinguish the sex chromosome pair from the four rod pairs. In the *D. gunungcola* spread, the dot chromosomes (Muller/Sturtevant/Novitsky element F) can be seen in the upper right of the cluster. Scale bars: 20 microns. For a more detailed analysis of the karyotype of *D. elegans* and related species, see Deng et al. 2007.

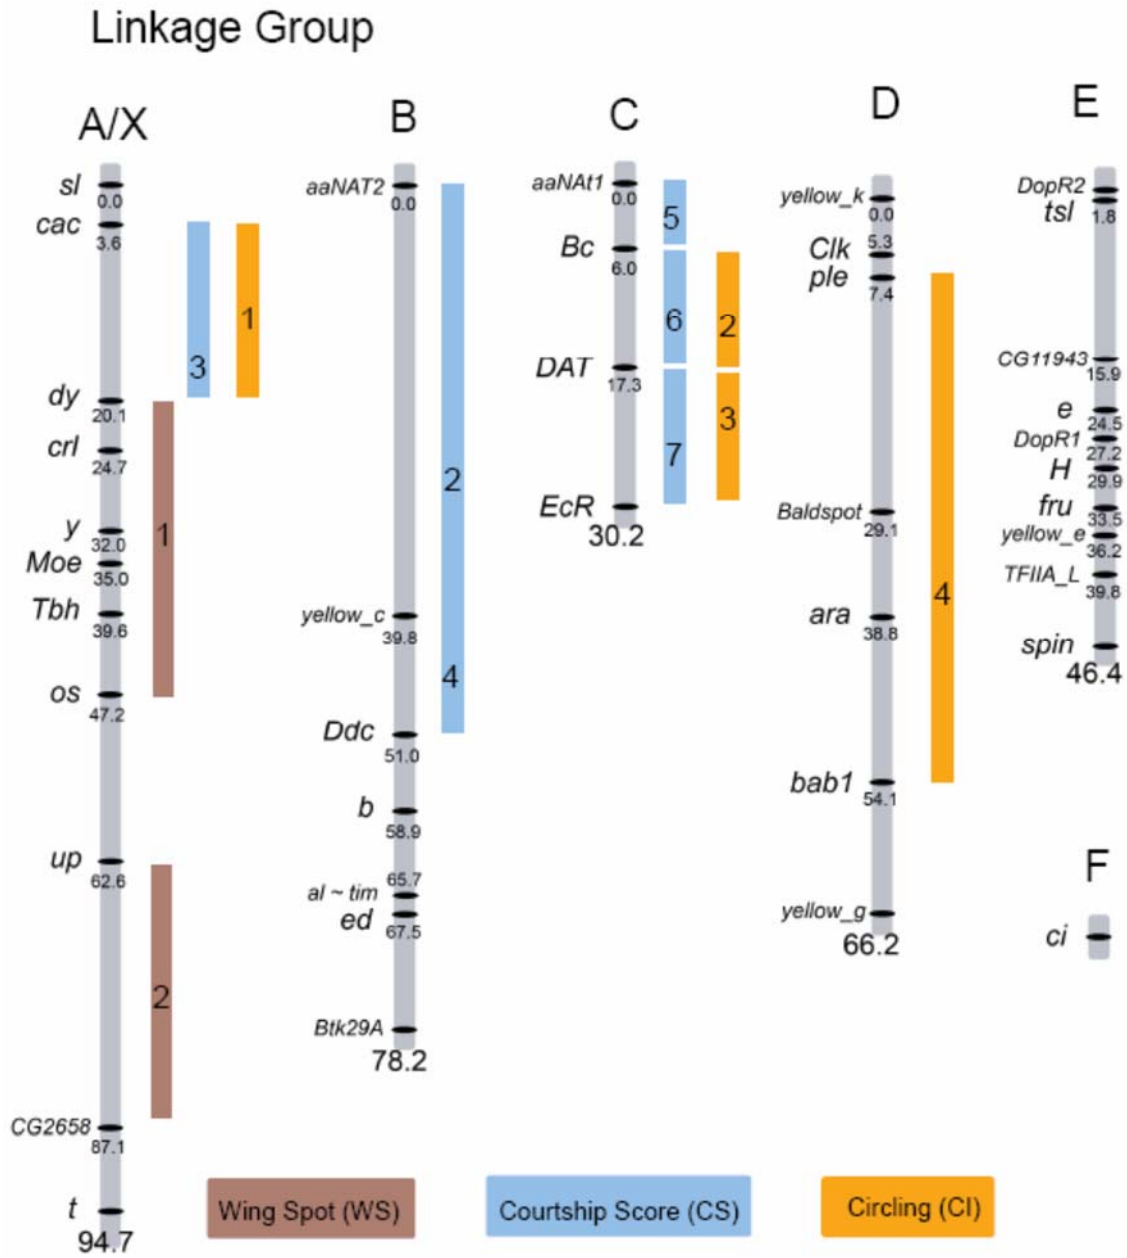

**Figure S4** Summary of QTL results from *gunungcola* backcross males. Designations A through E correspond to Muller's elements. Marker loci (on left of linkage groups) are named using the same names as the presumed orthologous *D. melanogaster* gene sequences used to develop the *D. elegans/D. gunungcola* markers. Intervals containing putative QTL are indicated on right of linkage groups (see also Table 2 and Figs. 3, 4). See Figure 2 for CIM maps of Spot Size 1, Spot Size 2, and Courtship Score datasets. See Figure 3 for IM maps of Wing Display, Circling, and Body Shaking datasets.

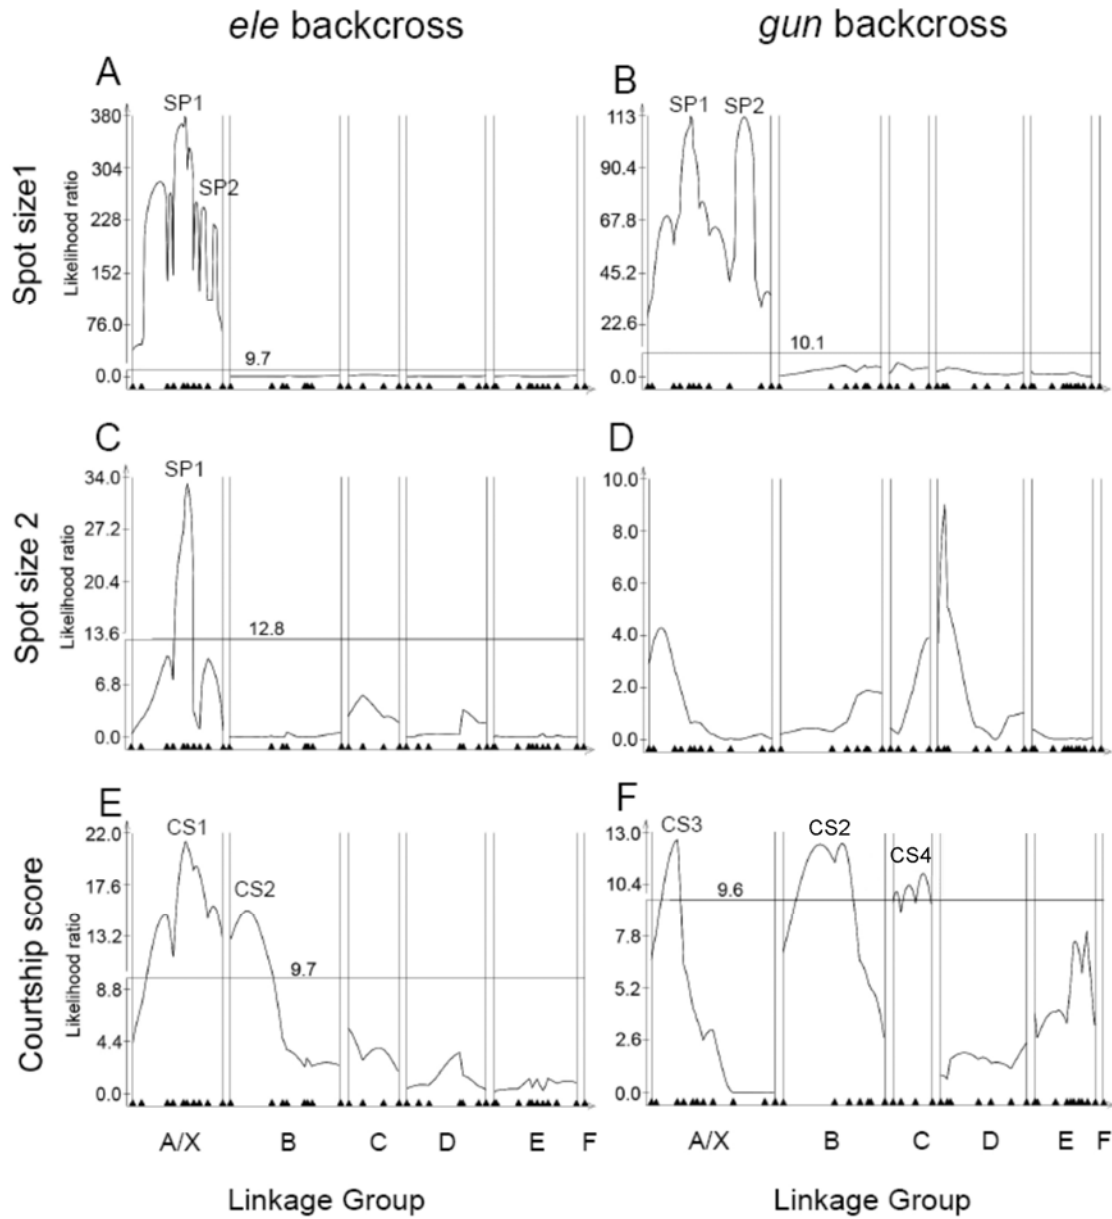

**Figure S5** Interval maps (IM) for *elegans* (left) and *gunungcola* (right) backcross populations. A., B. Spot Size 1, C., D. Spot Size 2, E., F. Courtship Score. Horizontal lines in each plot indicate LR significance thresholds (see Materials and Methods).

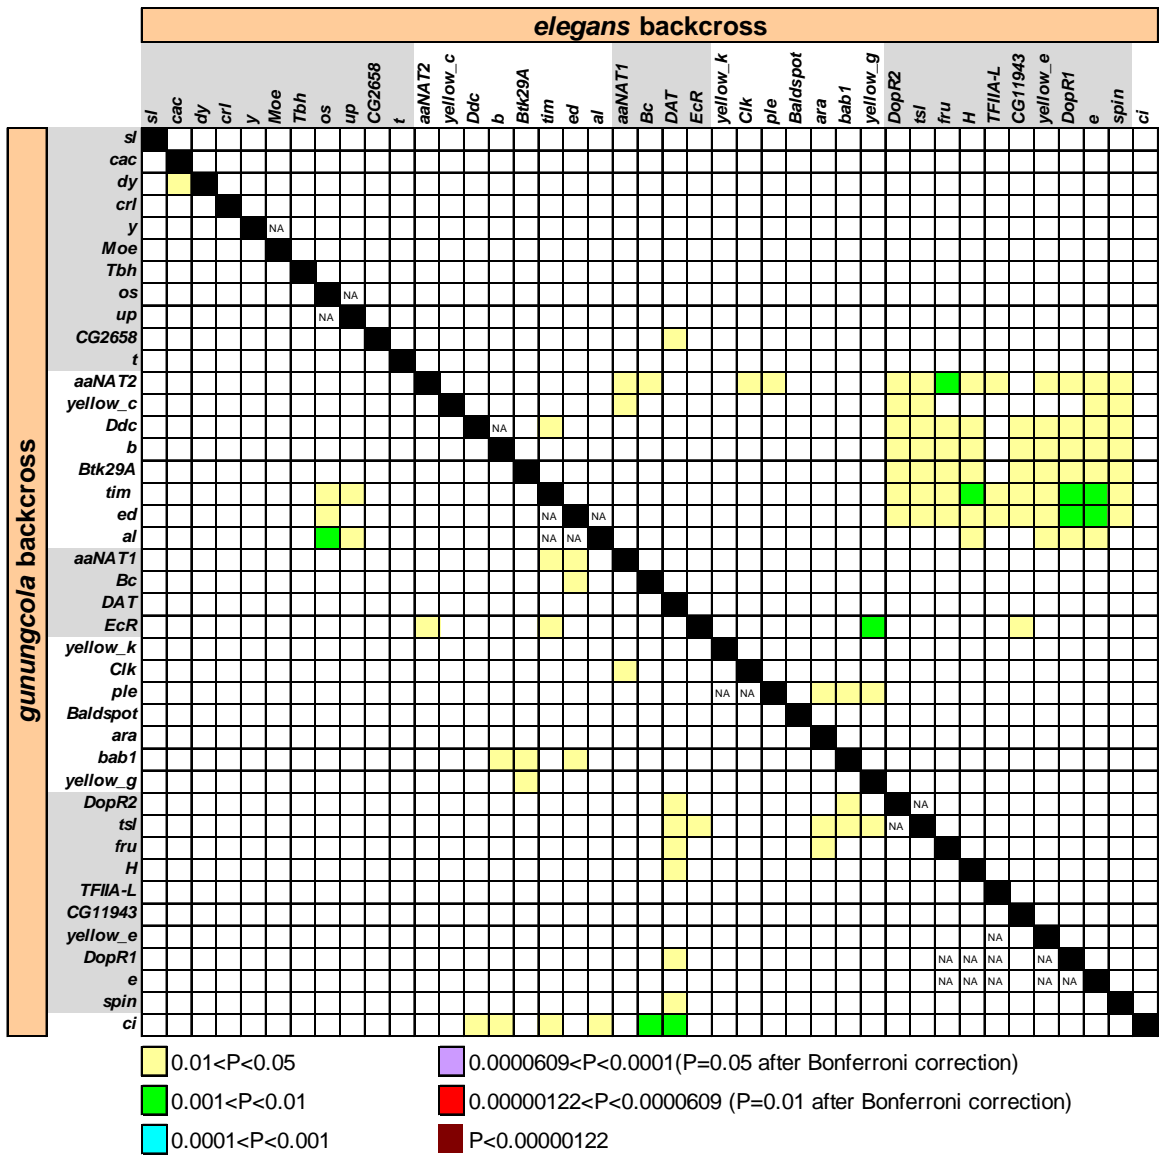

**Figure S6** Pairwise marker interaction significance levels (see Materials and Methods) for Spot Presence. *gunungcola* backcross results are in the lower left and *elegans* backcross results are in the upper right.

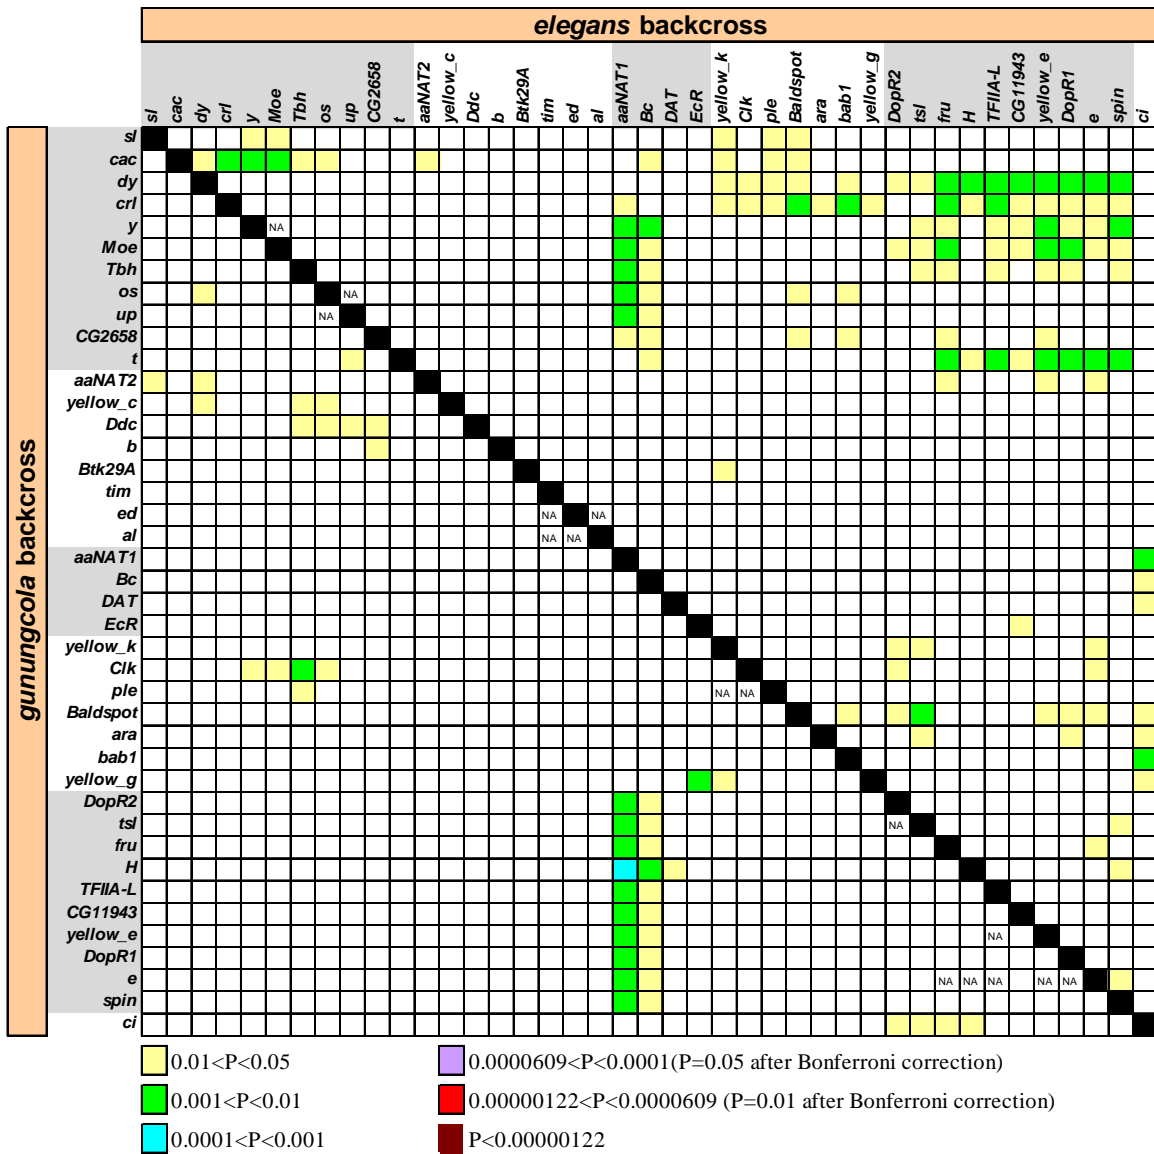

**Figure S7** Pairwise marker interaction significance levels (see Materials and Methods) for Courtship Score. *gunungcola* backcross results are in the lower left half and *elegans* backcross results are in the upper right.



**File S1**

**Raw Data**

Available for download as an Excel file at <http://www.g3journal.org/lookup/suppl/doi:10.1534/g3.114.013037/-/DC1>

**Table S1 List of the accession numbers of DNA sequences in this study.**

| Locus#                           | Species              | GenBank Accession number |
|----------------------------------|----------------------|--------------------------|
| X                                |                      |                          |
| <i>yellow</i>                    | <i>D. elegans</i>    | FJ889358                 |
|                                  | <i>D. gunungcola</i> | FJ889359                 |
| <i>CG2658</i>                    | <i>D. elegans</i>    | FJ889360                 |
|                                  | <i>D. gunungcola</i> | FJ889361                 |
| <i>Tyramine beta hydroxylase</i> | <i>D. elegans</i>    | FJ889362                 |
|                                  | <i>D. gunungcola</i> | FJ889363                 |
| <i>Moesin</i>                    | <i>D. elegans</i>    | FJ889364                 |
|                                  | <i>D. gunungcola</i> | FJ889365                 |
| <i>tan</i>                       | <i>D. elegans</i>    | FJ889366                 |
|                                  | <i>D. gunungcola</i> | FJ889367                 |
| <i>dusky(L)*</i>                 | <i>D. elegans</i>    | FJ889368                 |
|                                  | <i>D. gunungcola</i> | FJ889369                 |
| <i>dusky(R)*</i>                 | <i>D. elegans</i>    | FJ889370                 |
|                                  | <i>D. gunungcola</i> | FJ889371                 |
| <i>cacophony</i>                 | <i>D. elegans</i>    | FJ889372                 |
|                                  | <i>D. gunungcola</i> | FJ889373                 |
| <i>upheld</i>                    | <i>D. elegans</i>    | FJ889374                 |
|                                  | <i>D. gunungcola</i> | FJ889375                 |
| <i>small wing</i>                | <i>D. elegans</i>    | FJ889376                 |
|                                  | <i>D. gunungcola</i> | FJ889377                 |
| <i>courtless</i>                 | <i>D. elegans</i>    | FJ889378                 |
|                                  | <i>D. gunungcola</i> | FJ889379                 |
| <i>outstretched</i>              | <i>D. elegans</i>    | FJ889380                 |
|                                  | <i>D. gunungcola</i> | FJ889381                 |
| <i>CG11943</i>                   | <i>D. elegans</i>    | FJ889382                 |
|                                  | <i>D. gunungcola</i> | FJ889383                 |
| 2L                               |                      |                          |
| <i>aristaless</i>                | <i>D. elegans</i>    | FJ889384                 |
|                                  | <i>D. gunungcola</i> | FJ889385                 |
| <i>timeless</i>                  | <i>D. elegans</i>    | FJ889386                 |
|                                  | <i>D. gunungcola</i> | FJ889387                 |
| <i>echinoid</i>                  | <i>D. elegans</i>    | FJ889388                 |
|                                  | <i>D. gunungcola</i> | FJ889389                 |

**Table S1 (Continued)**

| Locus                                       | Species              | Accession number |
|---------------------------------------------|----------------------|------------------|
| <i>arylalkylamine N-acetyltransferase 2</i> | <i>D. elegans</i>    | FJ889390         |
|                                             | <i>D. gunungcola</i> | FJ889391         |
| <i>Btk family kinase at 29A</i>             | <i>D. elegans</i>    | FJ889392         |
|                                             | <i>D. gunungcola</i> | FJ889393         |
| <i>black</i>                                | <i>D. elegans</i>    | FJ889394         |
|                                             | <i>D. gunungcola</i> | FJ889395         |
| <i>yellow c</i>                             | <i>D. elegans</i>    | FJ889396         |
|                                             | <i>D. gunungcola</i> | FJ889397         |
| <i>Dopa decarboxylase</i>                   | <i>D. elegans</i>    | FJ889398         |
|                                             | <i>D. gunungcola</i> | FJ889399         |
| 2R                                          |                      |                  |
| <i>Ecdysone Receptor</i>                    | <i>D. elegans</i>    | FJ889400         |
|                                             | <i>D. gunungcola</i> | FJ889401         |
| <i>spinster</i>                             | <i>D. elegans</i>    | FJ889402         |
|                                             | <i>D. gunungcola</i> | FJ889403         |
| <i>Dopamine Transporter</i>                 | <i>D. elegans</i>    | FJ889404         |
|                                             | <i>D. gunungcola</i> | FJ889405         |
| <i>Black cells</i>                          | <i>D. elegans</i>    | FJ889406         |
|                                             | <i>D. gunungcola</i> | FJ889407         |
| <i>Dopamine N acetyltransferase</i>         | <i>D. elegans</i>    | FJ889408         |
|                                             | <i>D. gunungcola</i> | FJ889409         |
| 3L                                          |                      |                  |
| <i>bric a brac 1</i>                        | <i>D. elegans</i>    | FJ889410         |
|                                             | <i>D. gunungcola</i> | FJ889411         |
| <i>yellow g</i>                             | <i>D. elegans</i>    | FJ889412         |
|                                             | <i>D. gunungcola</i> | FJ889413         |
| <i>pale</i>                                 | <i>D. elegans</i>    | FJ889414         |
|                                             | <i>D. gunungcola</i> | FJ889415         |
| <i>Clock</i>                                | <i>D. elegans</i>    | FJ889416         |
|                                             | <i>D. gunungcola</i> | FJ889417         |
| <i>aracaun</i>                              | <i>D. elegans</i>    | FJ889418         |
|                                             | <i>D. gunungcola</i> | FJ889419         |
| <i>yellow k</i>                             | <i>D. elegans</i>    | FJ889420         |
|                                             | <i>D. gunungcola</i> | FJ889421         |

**Table S1 (Continued)**

| Locus                        | Species              | Accession number |
|------------------------------|----------------------|------------------|
| <i>Baldspot</i>              | <i>D. elegans</i>    | FJ889422         |
|                              | <i>D. gunungcola</i> | FJ889423         |
| 3R                           |                      |                  |
| <i>yellow e</i>              | <i>D. elegans</i>    | FJ889424         |
|                              | <i>D. gunungcola</i> | FJ889425         |
| <i>Dopamine Receptor (1)</i> | <i>D. elegans</i>    | FJ889426         |
|                              | <i>D. gunungcola</i> | FJ889427         |
| <i>fruitless</i>             | <i>D. elegans</i>    | FJ889428         |
|                              | <i>D. gunungcola</i> | FJ889429         |
| <i>Hairless</i>              | <i>D. elegans</i>    | FJ889430         |
|                              | <i>D. gunungcola</i> | FJ889431         |
| <i>ebony</i>                 | <i>D. elegans</i>    | FJ889432         |
|                              | <i>D. gunungcola</i> | FJ889433         |
| <i>torso-like</i>            | <i>D. elegans</i>    | FJ889434         |
|                              | <i>D. gunungcola</i> | FJ889435         |
| <i>TfIIA-L</i>               | <i>D. elegans</i>    | FJ889436         |
|                              | <i>D. gunungcola</i> | FJ889437         |
| <i>Dopamine Receptor2</i>    | <i>D. elegans</i>    | FJ889438         |
|                              | <i>D. gunungcola</i> | FJ889439         |
| 4                            |                      |                  |
| <i>cubitus interruptus</i>   | <i>D. elegans</i>    | FJ889440         |
|                              | <i>D. gunungcola</i> | FJ889441         |

# The chromosome arm where loci reside in *D. melanogaster*.

\*DNA sequence information between left and right primers of *dusky* is incomplete. Thus, the sequences obtained for designing the primer set of *dusky* are submitted separately.
