# Supplementary material for: The Genetic Architecture of Coordinately Evolving Male Wing Pigmentation and Courtship Behavior inDrosophila elegansandDrosophila gunungcola
Source: Oxford University Press journal article supplement (doi:10.1534/g3.114.013037), 2014-08-29
Supplement: 013037_figures1.pdf [file 013037_figures1.pdf]

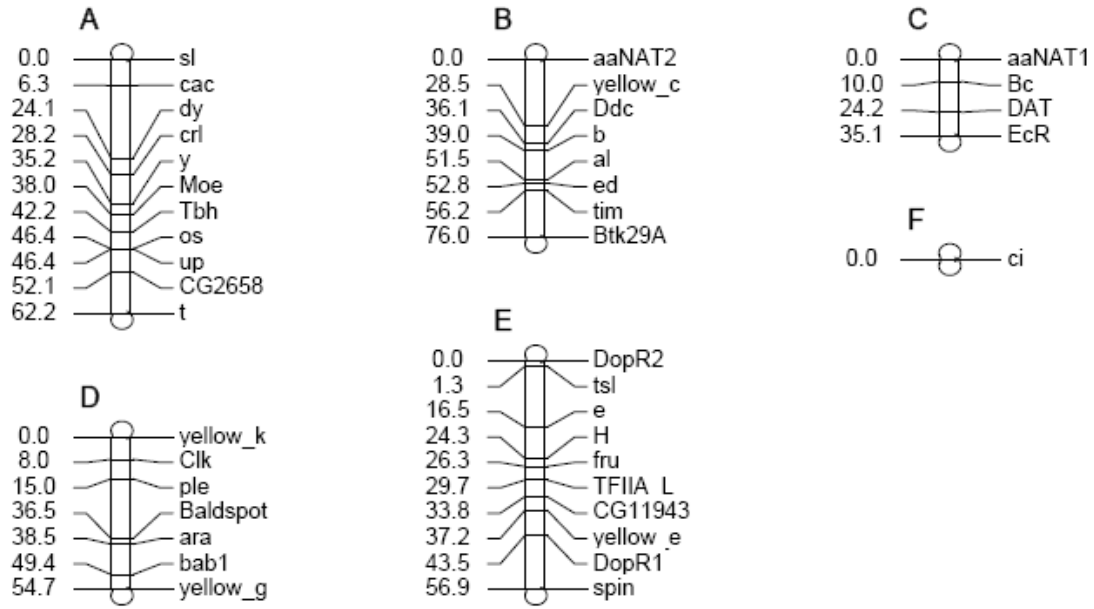

**Figure S1** The genetic linkage map obtained from the *ele* backcross data set. Designations A through E correspond to Muller's elements.
