# Supplementary material for: The Genetic Architecture of Coordinately Evolving Male Wing Pigmentation and Courtship Behavior inDrosophila elegansandDrosophila gunungcola
Source: Oxford University Press journal article supplement (doi:10.1534/g3.114.013037), 2014-08-29
Supplement: 013037_figures2.pdf [file 013037_figures2.pdf]

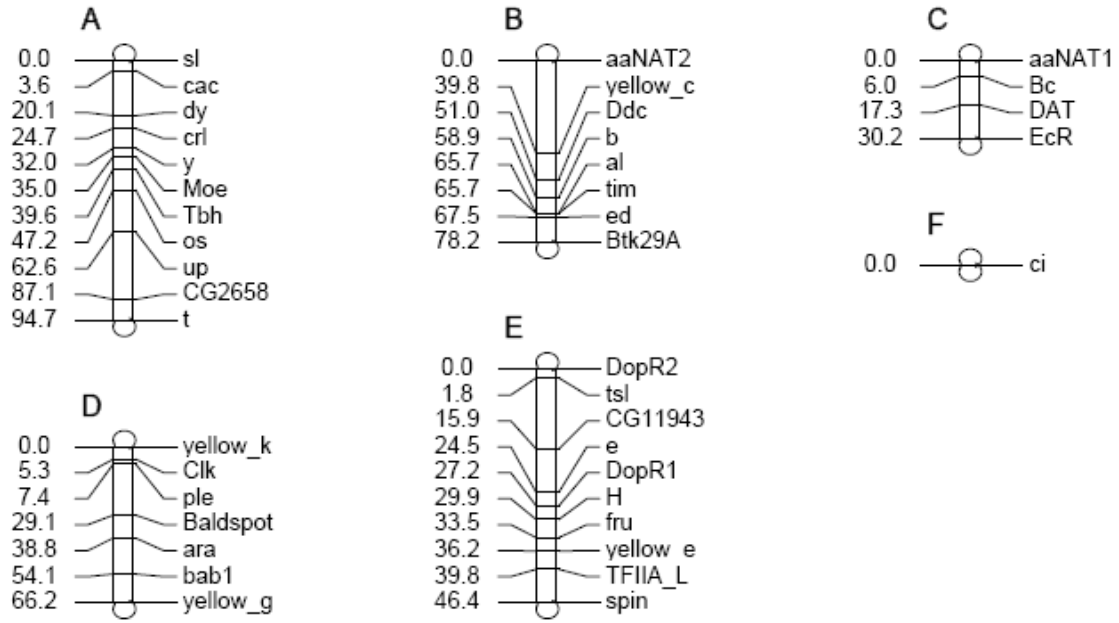

**Figure S2** The genetic linkage map obtained from the *gun* backcross set. Designations A through E correspond to Muller's elements.
