# Supplementary material for: The Genetic Architecture of Coordinately Evolving Male Wing Pigmentation and Courtship Behavior inDrosophila elegansandDrosophila gunungcola
Source: Oxford University Press journal article supplement (doi:10.1534/g3.114.013037), 2014-08-29
Supplement: 013037_figures3.pdf [file 013037_figures3.pdf]

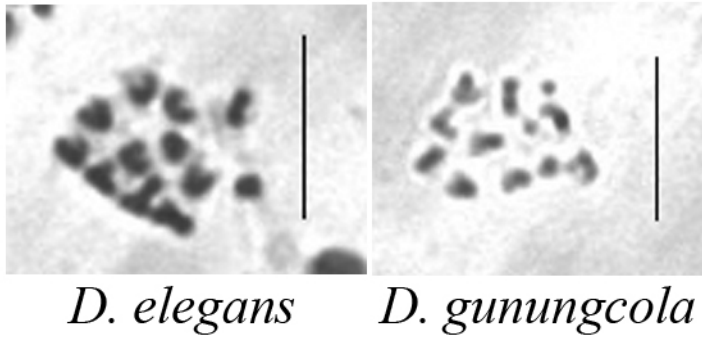

**Figure S3** Typical mitotic chromosome spreads of *D. elegans* and *D. gunungcola*. In the spreads above, clusters of 12 elements are clearly apparent. It is difficult to distinguish the sex chromosome pair from the four rod pairs. In the *D. gunungcola* spread, the dot chromosomes (Muller/Sturtevant/Novitsky element F) can be seen in the upper right of the cluster. Scale bars: 20 microns. For a more detailed analysis of the karyotype of *D. elegans* and related species, see Deng et al. 2007.
