# Supplementary material for: The Genetic Architecture of Coordinately Evolving Male Wing Pigmentation and Courtship Behavior inDrosophila elegansandDrosophila gunungcola
Source: Oxford University Press journal article supplement (doi:10.1534/g3.114.013037), 2014-08-29
Supplement: 013037_figures5.pdf [file 013037_figures5.pdf]

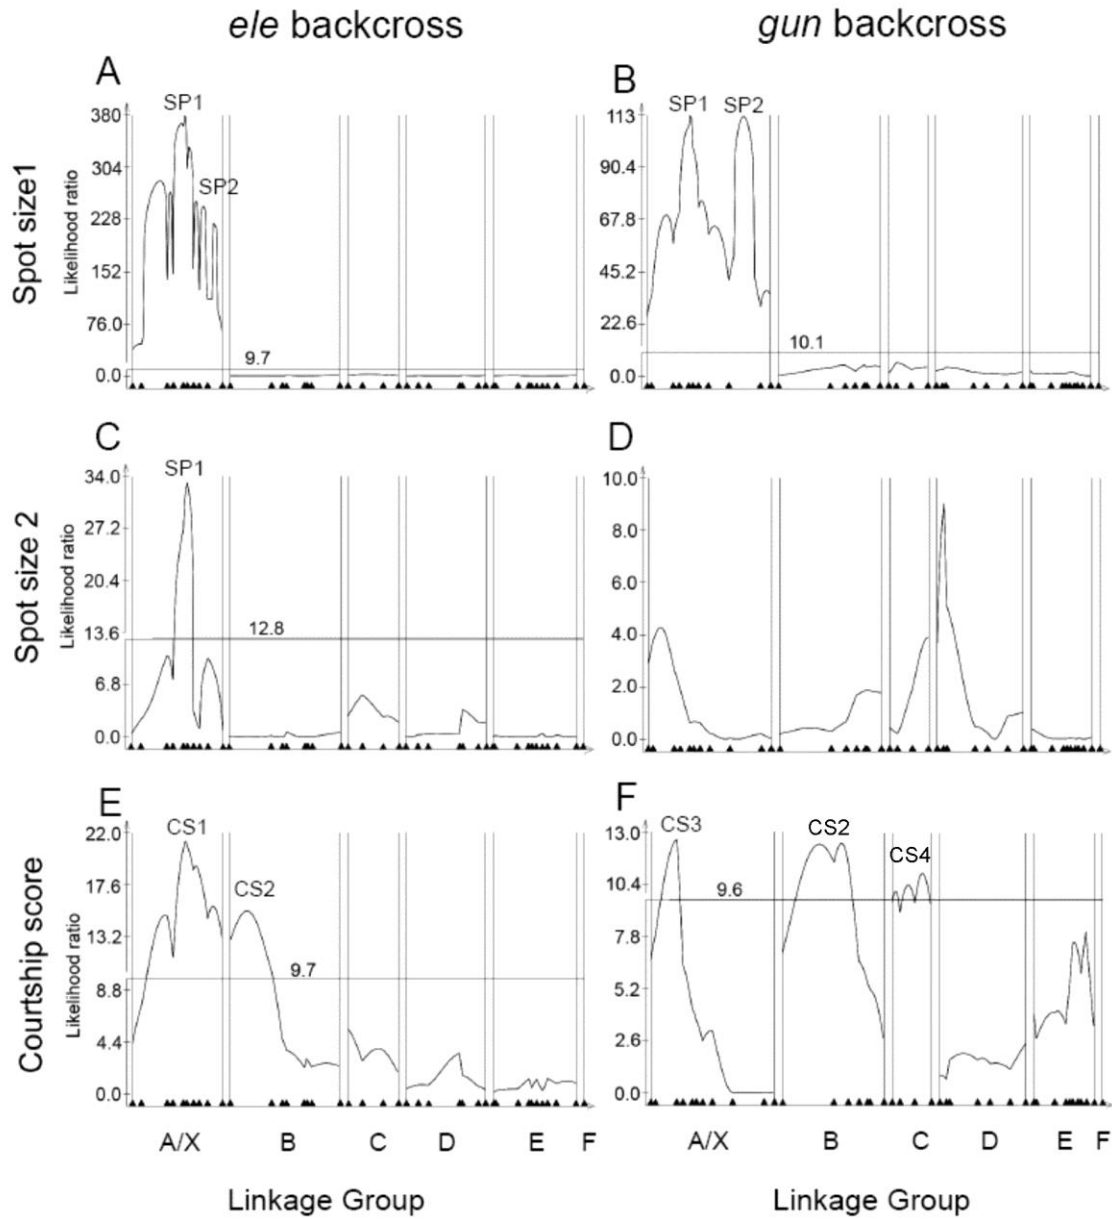

**Figure S5** Interval maps (IM) for *elegans* (left) and *gunungcola* (right) backcross populations. A., B. Spot Size 1, C., D. Spot Size 2, E., F. Courtship Score. Horizontal lines in each plot indicate LR significance thresholds (see Materials and Methods).
