# Supplementary material for: The Genetic Architecture of Coordinately Evolving Male Wing Pigmentation and Courtship Behavior in Drosophila elegans and Drosophila gunungcola
Source: G3 (Bethesda). 2014 Aug 27;4(11):2079–93. doi: 10.1534/g3.114.013037 (PMC4232533; doi:10.1534/g3.114.013037)
Supplement: Supporting Information [file supp_g3.114.013037_FileS1.xls]

## Sheet: ele backcross
IndLabel Genotypes-1 represents hemizygote for gun allele or heterozygote; 2 represents hemizygote or homozygote for ele allele
elegans backcross - 1st letters of individual name (HK or G) indicates cytological orgin (maternal grandmother); HK = elegans HK; G = gunungcola
no	MeanWS	courtship	courtship	2w_display	circling	abd_shaking	cacophony	sl	dusky	crl	y	Moe	Tbh	os	up	CG2658	tan	aaNAT2	yellow_c	Ddc	b	Btk29A	tim (new)	al	ed	aaNAT1	Bc	DAT	EcR	yellow_k	Clk	ple	Baldspot	araucan	bab1	yellow_g	tsl	DopR2	fru	H	DopR1	CG11943	yellow_e	TFIIA_L	ebony	spin
HKGHK1M01	0.074909	4	4	Y	Y	Y	2	2	2	2	2	2	2	2	2	2	2	2	2	2	2	2	2	2	2	1	1	1	1	1	1	1	1	1	1	1	1	1	1	1	1	1	1	1	1	1
HKGHK1M02	0	4	4	Y	Y	Y	1	1	1	1	1	1	1	1	1	1	1	2	1	1	1	1	1	1	1	2	2	2	2	1	1	1	1	1	1	1	1	1	1	1	1	1	1	1	1	1
HKGHK1M03	0.0982989	4	4	Y	Y	Y	2	2	2	2	2	2	2	2	2	2	2	1	2	2	2	2	2	2	2	2	2	2	2	2	2	2	1	1	1	1	1	1	1	1	1	1	1	1	1	1
HKGHK1M04	0.108721	4	4	Y	Y	Y	1	1	2	2	2	2	2	2	2	2	2	2	1	1	1	2	2	2	2	2	2	2	2	1	1	1	2	2	2	2	2	2	2	2	2	1	2	2	2	2
HKGHK1M05	0	3	3	N	Y	Y	1	1	1	1	1	1	1	1	1	1	1	1	1	1	1	1	1	1	1	1	1	1	1	1	1	1	2	2	2	2	2	2	2	2	1	2	2	2	2	2
HKGHK1M06	0	3	3	N	Y	Y	2	2	2	1	1	1	1	1	1	1	1	1	1	1	1	1	1	1	1	2	2	2	2	1	1	1	1	1	1	1	2	2	2	2	2	2	2	2	2	2
HKGHK1M07	0	2	2	Y	S	Y	1	2	1	1	1	1	1	1	1	1	1	1	1	1	1	1	1	1	1	1	1	1	1	2	2	2	2	2	2	*	2	2	2	2	2	2	2	2	2	2
HKGHK1M08	0.0916136	.	.	.	.	.	1	1	1	2	2	2	2	2	2	2	2	2	2	2	2	2	2	2	2	1	1	1	1	2	2	2	2	2	2	2	2	2	2	2	1	2	2	2	2	2
HKGHK1M09	0.0874797	4	4	Y	Y	Y	1	1	2	2	2	2	2	2	2	2	1	2	1	1	1	1	1	2	2	1	2	2	2	2	2	2	2	2	2	2	1	1	1	1	1	1	1	1	1	1
HKGHK1M10	0	3	3	Y	Y	Y	1	1	1	1	1	2	2	2	2	2	2	2	2	2	2	2	1	1	1	2	2	2	2	2	2	2	2	2	1	1	1	1	1	1	1	1	1	1	1	1
HKGHK1M11	0	.	.	.	.	.	1	1	1	1	1	1	1	1	1	1	1	2	1	1	1	1	1	1	1	2	2	2	2	1	1	2	1	1	2	2	1	1	2	2	2	2	1	2	2	2
HKGHK1M12	0.108033	3	3	Y	Y	L	2	2	2	2	2	2	2	2	2	2	2	2	2	2	2	2	2	2	2	1	2	2	2	1	1	1	2	2	2	2	1	1	1	1	1	1	1	1	1	1
HKGHK1M13	0.0844767	3	3	Y	Y	L	2	2	2	2	2	2	2	2	2	2	2	2	2	2	2	2	2	2	2	1	1	1	2	2	2	2	1	1	1	1	1	1	1	1	1	1	1	1	2	1
HKGHK1M14	0	4	4	Y	Y	Y	2	2	2	2	1	1	1	1	1	1	1	2	2	2	2	2	2	2	2	2	2	2	2	2	2	2	2	2	2	2	1	1	1	1	1	1	1	1	1	1
HKGHK1M15	0	4	4	Y	Y	Y	1	1	1	1	1	1	1	1	1	1	1	2	2	2	2	2	2	2	2	1	1	1	1	1	1	1	1	1	1	1	1	1	1	1	1	1	1	1	1	1
HKGHK1M16	0	2	2	N	S	S	1	1	1	1	1	1	1	1	1	1	1	1	1	1	1	1	1	1	1	2	2	2	2	1	1	1	2	2	1	1	2	2	2	2	2	2	2	2	2	2
HKGHK1M17	0	4	4	Y	Y	Y	2	2	1	1	1	1	1	1	1	*	1	1	1	1	1	1	1	1	1	2	2	2	2	2	2	2	2	2	2	2	1	1	1	1	1	1	1	1	1	1
HKGHK1M18	0	4	4	Y	Y	Y	2	2	1	1	1	1	1	1	1	1	1	2	2	2	2	2	2	2	2	2	2	1	1	1	1	1	1	1	1	1	1	1	1	1	1	1	1	1	1	1
HKGHK1M19	.	3	3	Y	Y	Y	2	2	2	2	2	2	2	2	2	2	2	2	2	2	2	2	2	2	2	2	2	2	2	1	1	1	1	1	1	1	1	1	1	1	1	1	1	1	1	1
HKGHK1M20	0	2	2	N	Y	Y	1	1	1	1	1	1	1	1	1	1	1	2	2	2	2	2	2	2	2	1	1	1	1	2	2	2	2	2	2	2	1	1	1	1	2	2	2	2	2	2
HKGHK1M21	0	.	.	.	.	.	1	1	1	1	1	1	1	1	1	1	1	1	1	2	2	2	2	2	2	1	1	1	1	2	2	1	1	1	1	1	1	1	1	1	1	1	1	1	1	1
HKGHK1M22	0.0140167	.	.	.	.	.	1	1	1	1	1	1	2	2	2	1	2	2	2	2	2	2	2	2	2	2	2	2	2	2	2	2	2	1	1	1	2	2	2	2	2	2	2	2	2	2
HKGHK1M23	.	4	4	Y	Y	Y	2	2	2	2	2	2	2	2	2	2	2	1	1	1	1	1	1	1	1	1	1	1	1	1	1	1	1	1	1	2	2	2	2	2	2	2	2	2	2	2
HKGHK1M24	.	4	4	Y	Y	Y	2	2	2	2	2	2	2	2	2	2	2	2	2	2	2	2	2	2	2	1	1	1	1	1	1	1	2	2	2	2	2	2	2	2	1	2	2	2	2	2
HKGHK1M25	.	4	4	Y	Y	Y	1	1	2	2	2	2	2	2	2	2	2	2	2	2	2	2	2	2	2	1	1	1	1	1	1	1	1	1	1	1	2	2	2	2	2	2	2	2	2	2
HKGHK1M26	0	2	2	Y	N	S	1	*	*	1	1	*	1	1	1	1	2	2	2	2	2	2	2	2	2	1	2	1	1	2	2	2	2	2	2	*	1	1	1	1	1	1	1	1	1	1
HKGHK1M27	0.0810025	3	3	N	Y	S	2	2	2	2	2	2	2	2	2	2	2	1	1	1	1	1	1	1	1	1	1	1	1	1	1	1	2	2	2	2	1	1	2	2	2	2	2	2	2	2
HKGHK1M28	0.0784614	3	3	N	Y	Y	2	2	2	2	2	2	2	2	2	2	2	2	2	2	2	2	2	2	2	1	1	1	1	1	1	2	1	1	1	1	1	1	1	1	1	1	1	1	1	1
HKGHK1M29	0	3	3	N	Y	Y	2	2	1	1	1	1	1	1	1	1	1	1	1	1	1	1	1	2	1	2	2	2	2	2	2	2	2	2	2	2	2	2	2	2	2	2	2	2	2	2
HKGHK1M30	0.087753	3	3	N	S	Y	2	2	2	2	2	2	2	2	2	2	2	1	1	1	1	1	1	1	1	1	1	1	1	1	1	1	1	1	1	1	1	1	1	1	1	1	1	1	1	1
HKGHK1M31	0.0854771	4	4	Y	Y	Y	2	2	2	2	2	2	2	2	2	2	2	2	2	2	2	2	2	2	2	1	1	1	1	1	1	1	1	1	1	1	2	2	2	2	2	2	2	2	2	2
HKGHK1M32	0	1	1	N	N	N	2	2	2	2	1	1	1	1	1	1	1	1	1	1	1	1	1	1	1	1	1	1	1	1	1	1	1	1	1	1	1	1	1	1	1	1	1	1	1	1
HKGHK1M33	.	4	4	Y	Y	Y	2	2	2	2	2	2	2	2	2	2	2	2	1	1	1	2	1	1	1	2	2	2	2	2	2	2	2	2	2	2	1	1	1	1	1	1	1	1	1	1
HKGHK1M34	.	3	3	Y	Y	S	2	2	2	2	2	2	2	2	2	2	2	1	1	1	1	1	1	1	1	1	2	2	2	2	2	1	1	1	1	1	1	1	1	1	1	1	1	1	1	1
HKGHK1M35	.	2	2	N	Y	Y	2	2	2	2	2	2	2	2	2	2	2	2	1	1	1	1	1	1	1	1	1	1	1	2	2	2	2	2	1	2	1	1	1	1	1	1	1	1	1	1
HKGHK1M36	0	3	3	N	Y	S	1	1	1	1	1	1	1	1	1	1	1	2	2	2	2	2	2	2	2	2	2	2	2	2	2	2	1	1	1	1	1	1	1	1	1	1	1	1	1	1
HKGHK1M37	0.10394	2	2	N	Y	Y	2	2	2	2	2	2	2	2	2	2	2	2	2	2	2	2	2	2	2	1	2	1	1	1	2	2	2	2	2	2	2	2	2	2	2	2	2	2	2	2
HKGHK1M38	0	3	3	Y	S	S	1	1	1	1	1	1	1	1	1	1	1	1	1	1	1	1	1	1	1	1	1	1	1	2	2	2	2	2	2	2	1	1	1	2	1	1	1	1	1	1
HKGHK1M39	.	4	4	Y	Y	Y	1	1	2	2	2	2	2	2	2	2	2	2	1	1	1	1	1	1	1	1	1	1	1	2	2	2	2	2	2	*	1	1	2	*	2	2	2	2	2	2
HKGHK1M40	0.122446	3	3	N	Y	Y	2	2	2	2	2	2	2	2	2	2	2	1	1	1	2	2	2	2	2	2	2	2	2	2	2	2	2	2	2	2	2	2	2	2	2	2	2	2	2	2
HKGHK1M41	0	3	3	N	Y	L	1	1	1	1	1	1	1	2	2	2	2	2	2	2	2	1	2	2	2	1	1	1	1	1	1	1	1	1	1	1	1	1	1	*	1	1	1	1	1	1
HKGHK1M42	0	.	.	.	.	.	2	2	1	1	1	1	1	1	1	1	1	1	1	1	1	1	1	1	1	1	1	1	1	2	1	1	1	1	1	1	1	1	1	1	1	1	1	1	1	1
HKGHK1M43	0	3	3	Y	Y	S	1	1	1	1	1	1	1	1	1	1	1	2	2	2	2	2	2	2	2	2	2	2	2	2	2	2	1	1	1	1	1	1	1	1	1	1	1	1	1	1
HKGHK1M45	0	3	3	Y	Y	L	1	1	1	1	1	1	1	1	1	1	1	2	2	1	1	1	1	1	1	2	2	2	2	2	2	2	2	2	2	2	1	1	2	2	2	2	2	2	2	1
HKGHK1M46	0.119739	3	3	Y	Y	S	2	2	2	2	2	2	2	2	2	2	2	1	2	2	2	2	2	2	2	1	2	2	2	2	2	2	2	2	2	2	1	1	1	1	1	1	1	1	1	1
HKGHK1M47	0.104794	3	3	Y	Y	S	2	2	2	2	2	2	2	2	2	2	2	2	2	2	2	2	2	2	2	2	2	2	2	1	1	1	1	1	1	1	1	1	1	1	1	1	1	1	1	1
HKGHK1M48	0	2	2	N	Y	L	1	1	1	1	1	1	1	1	1	1	1	1	1	1	1	1	1	1	1	1	1	1	1	1	1	1	1	1	1	1	2	2	2	2	2	2	2	2	2	1
HKGHK1M49	.	4	4	Y	Y	Y	2	2	2	2	2	2	2	2	2	2	2	2	2	2	2	1	1	1	1	2	2	2	2	2	2	2	2	2	2	2	2	2	2	2	2	2	2	2	2	1
HKGHK1M50	0	3	3	Y	Y	S	2	1	1	2	1	1	2	2	2	1	2	2	2	2	2	1	2	2	2	2	2	2	2	2	2	2	2	2	2	2	1	1	1	1	1	1	1	1	1	1
HKGHK1M51	0.0829629	3	3	Y	S	S	2	2	2	2	2	2	2	2	2	2	*	1	2	2	2	2	1	1	1	1	1	1	1	2	2	1	1	1	1	1	1	1	1	1	1	1	1	1	1	1
HKGHK2M04	.	3	3	Y	S	Y	1	1	2	2	2	2	2	2	2	2	2	2	2	1	1	1	1	1	1	1	1	2	2	2	2	2	2	2	2	2	1	1	1	1	2	1	1	1	1	1
HKGHK2M05	.	2	2	N	N	N	1	1	2	2	2	2	2	2	2	2	2	1	1	1	1	1	1	1	1	2	1	1	1	1	1	1	1	1	1	1	1	1	1	1	1	1	1	1	1	1
HKGHK2M06	.	2	2	N	S	N	2	2	2	2	2	2	2	2	2	2	2	1	1	1	1	1	2	2	2	2	2	2	2	1	1	1	1	1	1	1	1	1	1	1	1	1	1	1	1	1
HKGHK2M07	0.0729963	3	3	Y	Y	L	2	2	2	2	2	2	2	2	2	1	1	1	1	2	2	1	2	2	2	2	2	2	2	2	2	2	2	2	2	2	1	1	1	1	1	1	1	1	1	1
HKGHK2M08	0.102799	4	4	Y	Y	Y	1	1	2	2	2	2	2	2	2	2	2	2	2	2	2	2	1	1	1	2	2	2	1	1	1	1	1	1	2	2	2	2	2	2	2	2	2	2	2	1
HKGHK2M09	0	.	.	.	.	.	2	2	2	2	2	2	2	2	2	2	2	2	1	1	1	1	2	1	1	2	2	2	2	*	*	1	1	1	1	*	1	1	1	1	1	1	1	1	1	1
HKGHK2M10	0.10483	3	3	Y	Y	S	2	2	*	2	2	2	2	2	2	2	2	1	2	1	1	1	2	1	1	2	2	2	2	2	2	2	2	2	2	*	2	2	*	2	2	2	2	2	2	2
HKGHK2M11	.	3	3	Y	Y	L	2	*	*	2	2	2	2	*	*	*	2	*	*	1	*	*	*	1	*	1	2	1	*	*	2	1	1	1	*	*	*	*	*	*	*	1	*	1	1	*
HKGHK2M12	0.0902927	3	3	Y	S	Y	2	2	*	2	2	2	2	2	*	1	1	1	1	1	1	1	*	1	1	1	2	2	2	*	2	1	1	1	1	*	2	2	1	2	1	1	1	1	2	1
HKGHK2M13	0.104837	3	3	Y	Y	S	2	2	2	2	2	2	2	2	2	2	2	1	1	1	1	1	2	1	1	2	2	2	2	1	1	1	1	1	1	*	1	1	1	1	1	1	1	1	1	1
HKGHK2M15	0.103936	3	3	N	Y	Y	2	2	*	2	2	2	2	1	1	1	1	2	2	2	2	2	2	2	2	1	1	1	1	2	2	2	2	2	2	*	2	2	2	2	2	2	2	2	2	2
HKGHK2M16	0.0880251	4	4	Y	Y	Y	2	2	2	2	2	2	2	2	2	2	2	2	2	2	2	2	2	2	2	1	1	2	2	2	2	2	2	2	2	*	1	1	2	2	2	2	2	2	2	2
HKGHK2M18	0	2	2	N	S	S	1	1	1	1	1	1	2	2	2	2	2	1	1	1	1	1	1	1	1	1	1	1	1	2	1	1	1	1	1	1	2	2	2	2	2	2	2	2	2	2
HKGHK2M19	0	1	1	N	N	Y	1	1	1	1	1	1	1	1	1	1	1	1	1	1	1	1	1	1	1	1	1	1	1	1	1	1	2	1	1	1	2	2	2	2	2	2	2	2	2	2
HKGHK2M20	0	3	3	Y	Y	S	1	1	1	1	1	1	1	1	1	1	1	1	2	2	2	2	2	2	2	2	2	2	2	2	2	2	2	2	2	2	1	1	1	1	1	1	1	1	1	1
HKGHK2M21	0	2	2	N	N	Y	1	1	1	1	1	1	1	1	1	1	1	1	1	1	1	1	1	1	1	1	1	1	1	2	2	2	2	2	2	2	1	1	2	2	2	2	2	2	2	2
HKGHK2M22	0	4	4	Y	Y	Y	1	1	1	1	1	1	1	1	1	1	1	1	1	1	1	1	1	1	1	1	1	1	1	1	1	1	1	1	1	1	2	2	2	2	2	2	2	2	2	2
HKGHK2M23	0.0885915	4	4	Y	Y	Y	2	2	2	2	2	2	2	2	2	2	2	2	1	1	1	1	1	1	1	1	1	1	1	2	2	2	2	2	2	2	1	1	1	1	2	2	2	2	1	1
HKGHK2M24	0	3	3	Y	Y	L	2	1	1	1	1	1	1	1	1	2	2	2	1	1	1	1	1	1	1	1	1	2	2	2	2	2	2	2	2	2	1	1	1	1	1	1	1	1	1	1
HKGHK2M25	0.0936305	4	4	Y	Y	Y	2	2	2	2	2	2	2	2	2	2	2	1	1	1	1	1	1	1	1	1	1	2	2	2	2	2	2	2	2	2	1	1	1	1	1	1	1	1	1	1
HKGHK2M26	0	2	2	N	Y	S	1	1	1	1	1	1	1	1	1	1	1	1	1	*	1	1	1	1	1	1	1	1	1	2	2	2	2	2	2	2	1	1	1	1	1	1	1	1	2	1
HKGHK2M27	0	3	3	Y	Y	S	1	2	1	1	1	2	2	2	2	2	2	2	1	1	1	1	1	1	1	2	2	2	2	1	1	1	1	1	1	1	2	2	2	2	2	2	2	2	2	2
HKGHK2M28	0	3	3	Y	Y	S	2	2	1	1	1	1	1	1	1	1	1	1	1	1	1	1	1	1	1	2	2	2	1	1	1	1	1	1	1	1	1	1	1	1	1	1	1	1	1	1
HKGHK2M29	0	3	3	Y	Y	S	2	2	2	2	1	1	1	1	1	1	1	2	2	2	2	2	2	2	2	1	1	1	1	2	2	2	1	1	1	1	1	1	1	1	1	1	1	1	1	1
HKGHK2M30	0.0805366	3	3	Y	Y	S	2	2	2	2	2	2	2	2	2	2	2	2	1	1	1	1	1	1	1	1	1	1	1	2	1	1	1	1	2	2	2	2	2	2	2	2	1	2	2	2
HKGHK2M31	.	4	4	Y	Y	Y	1	1	1	1	2	2	2	2	2	2	2	2	2	1	1	1	1	1	1	1	1	1	1	2	1	1	1	1	1	1	2	2	2	2	2	2	2	2	*	2
HKGHK2M32	0	3	3	Y	Y	S	1	1	1	1	1	1	1	1	1	1	1	1	1	1	1	1	1	1	1	1	1	1	1	2	1	1	1	1	1	1	2	2	2	2	2	2	2	2	*	2
HKGHK2M33	.	3	3	Y	Y	S	2	2	2	2	2	2	2	2	2	2	2	2	2	2	2	2	2	2	2	1	1	1	1	2	2	2	2	2	1	1	1	1	1	1	1	1	1	1	*	1
HKGHK2M34	.	3	3	Y	Y	L	2	2	2	2	2	2	2	2	2	2	2	1	1	1	1	1	1	1	1	2	2	2	2	2	2	2	1	1	1	1	1	1	1	1	1	1	1	1	*	1
HKGHK2M35	.	3	3	N	Y	L	2	2	2	2	2	2	2	1	1	1	1	1	2	2	2	1	2	2	2	2	2	2	2	1	1	1	1	1	1	1	2	2	2	2	2	2	2	2	*	2
HKGHK2M36	0	3	3	Y	Y	S	1	1	1	1	1	1	1	1	1	1	1	1	2	2	2	1	2	2	2	2	2	2	1	1	1	1	1	1	1	1	1	1	1	1	1	1	1	1	1	1
HKGHK2M37	.	2	2	N	Y	S	2	2	2	2	*	2	2	2	2	2	2	1	1	2	2	1	2	2	2	1	1	1	1	2	2	2	2	2	2	*	1	1	1	1	1	1	1	1	2	1
HKGHK2M38	0.0928023	3	3	Y	Y	S	2	1	2	2	2	2	2	2	2	2	2	2	1	1	1	1	1	1	1	1	1	1	1	1	1	1	2	2	2	2	1	1	1	1	1	1	1	1	2	1
HKGHK2M39	0.107943	4	4	Y	Y	Y	1	1	2	2	2	2	2	2	2	2	2	2	2	2	2	1	2	2	2	2	2	2	2	2	2	1	1	1	1	1	1	1	1	1	1	1	1	1	1	1
HKGHK2M40	0.120302	3	3	Y	S	Y	2	2	2	2	2	2	2	2	2	2	2	2	2	2	2	2	1	1	1	2	2	2	2	1	1	1	1	1	1	1	1	1	1	1	1	1	1	1	1	1
HKGHK2M41	0	.	.	.	.	.	2	2	1	1	1	1	2	1	1	1	2	1	1	1	1	1	1	1	1	2	2	2	2	2	1	2	2	2	2	2	1	1	1	1	1	1	1	1	*	1
HKGHK2M42	.	3	3	Y	Y	Y	2	2	2	2	2	2	2	2	2	2	2	1	1	1	1	1	1	1	1	2	2	2	1	1	1	1	1	1	1	1	1	1	2	2	2	2	2	2	1	2
HKGHK2M43	0.121424	2	2	N	Y	Y	2	2	2	2	2	2	2	2	2	2	2	1	1	1	2	2	1	1	1	2	2	2	2	2	2	2	2	2	2	2	2	2	2	2	2	2	2	2	2	2
HKGHK2M45	0	3	3	Y	Y	S	1	1	1	1	1	1	1	1	1	1	1	1	1	1	1	2	1	1	1	2	2	2	2	2	2	2	1	1	1	2	1	1	1	1	1	1	1	1	1	1
HKGHK2M46	0.110499	2	2	N	Y	N	2	2	2	2	2	2	2	2	2	2	2	1	1	1	1	2	1	1	1	2	2	2	2	2	2	2	2	2	1	1	1	1	1	1	1	1	1	1	1	1
HKGHK2M47	0	.	.	.	.	.	1	1	1	1	1	1	1	1	1	1	1	1	1	1	2	1	1	1	1	1	1	1	1	2	2	2	2	2	2	1	2	2	2	2	2	2	2	2	2	2
HKGHK2M48	0	2	2	N	Y	L	1	1	1	1	1	1	1	1	1	1	1	1	1	1	1	2	1	1	1	1	1	1	1	2	2	2	2	2	2	1	2	2	2	2	2	2	2	2	2	2
HKGHK2M49	0.115958	3	3	Y	Y	S	1	1	1	1	2	2	2	2	2	2	2	2	2	2	2	1	2	2	2	1	1	1	1	2	2	2	2	2	2	2	1	1	1	1	1	1	1	1	2	1
GHKHK1M01	0.106626	4	4	Y	Y	Y	2	2	2	2	2	2	2	2	2	2	2	2	1	1	1	1	1	1	1	2	2	2	2	2	2	2	2	2	2	2	2	2	2	2	1	1	1	2	2	2
GHKHK1M02	0.103515	4	4	Y	Y	Y	2	2	2	2	2	2	2	2	2	2	2	2	2	2	2	1	2	2	2	2	2	2	2	2	2	2	1	1	1	1	2	2	2	2	2	1	2	2	2	2
GHKHK1M03	0.112386	4	4	Y	Y	Y	2	2	2	2	2	2	2	2	2	2	2	2	2	*	2	2	2	2	2	2	2	2	1	2	2	2	2	2	2	2	1	1	2	2	2	2	2	2	2	2
GHKHK1M04	0	4	4	Y	Y	Y	1	1	1	1	1	1	1	1	1	1	1	2	2	1	1	1	1	1	1	2	2	1	1	1	1	1	1	1	1	1	2	2	2	2	2	2	2	2	2	2
GHKHK1M05	0	2	2	N	Y	Y	1	1	1	1	1	1	1	1	1	1	1	2	1	1	1	1	1	1	1	1	1	1	1	2	2	2	2	2	2	2	2	2	2	2	2	2	2	2	2	2
GHKHK1M06	0	2	2	N	Y	Y	1	1	1	1	1	1	1	1	1	2	2	2	1	1	1	1	1	1	1	1	2	2	2	2	2	2	2	2	2	2	2	2	1	1	1	1	1	1	1	1
GHKHK1M07	0	2	2	N	Y	S	1	1	1	1	1	1	1	1	1	1	1	2	2	2	2	2	2	2	2	1	1	1	1	2	2	2	2	2	1	1	1	1	1	1	1	1	1	1	1	1
GHKHK1M08	0.114904	4	4	Y	Y	S	2	2	2	2	2	2	2	2	2	2	2	1	1	1	1	1	1	1	1	2	2	1	1	1	1	2	1	1	1	1	2	2	2	2	2	2	2	2	2	2
GHKHK1M09	0	3	3	Y	Y	Y	2	2	1	1	1	1	1	1	1	1	1	1	1	1	1	1	1	1	1	1	1	1	1	1	1	1	1	1	1	1	2	2	2	2	2	2	2	2	2	1
GHKHK1M10	0	4	4	Y	Y	Y	2	2	2	1	1	1	1	1	1	1	2	2	2	2	2	2	2	2	2	2	1	2	2	1	1	1	1	1	1	1	2	2	2	2	2	2	2	2	2	2
GHKHK1M11	0.0892404	3	3	N	N	Y	2	2	2	1	2	2	2	2	2	2	2	2	2	2	2	2	2	2	2	1	1	1	1	2	1	1	1	1	1	1	2	2	2	2	2	2	2	2	2	2
GHKHK1M12	0.0845232	2	2	N	Y	Y	2	2	2	2	2	2	2	1	1	1	1	2	1	1	1	1	1	1	1	2	2	2	1	2	2	2	2	2	2	2	1	1	1	1	1	1	1	1	1	1
GHKHK1M13	0.102313	4	4	Y	N	Y	2	2	2	2	2	2	2	2	2	2	2	2	2	2	2	2	1	1	1	2	2	2	2	1	1	1	1	2	1	1	2	2	1	1	1	1	1	1	1	1
GHKHK1M14	0	2	2	Y	Y	L	1	1	1	1	1	1	1	1	1	1	1	2	2	2	2	2	2	2	2	1	1	2	2	2	2	2	2	2	2	2	1	1	1	1	1	1	1	1	1	1
GHKHK1M15	0.0839359	4	4	Y	Y	Y	2	2	2	2	2	2	2	2	2	2	2	1	1	1	1	1	1	1	1	2	2	2	2	2	2	2	1	1	1	1	1	1	1	1	1	1	1	1	1	1
GHKHK1M16	0.089308	4	4	Y	Y	Y	2	2	2	2	2	2	2	2	2	2	2	1	1	1	1	1	1	1	1	1	1	1	1	2	2	2	2	2	2	2	2	2	2	2	2	2	2	2	2	2
GHKHK1M17	0	2	2	N	Y	Y	1	1	1	1	1	1	1	1	1	1	1	1	2	2	2	2	2	2	2	2	2	2	2	1	1	1	1	1	1	1	2	2	2	2	2	2	2	2	2	2
GHKHK1M18	0.0609379	4	4	Y	Y	Y	2	2	2	2	2	2	2	2	2	2	2	2	2	2	2	2	2	2	2	2	2	2	2	1	1	1	1	1	1	1	2	2	2	2	2	2	2	2	2	2
GHKHK1M19	0.0506401	.	.	.	.	.	1	2	1	1	1	1	1	1	1	1	2	1	1	1	1	1	1	1	1	2	2	2	1	1	1	1	1	1	1	1	2	2	2	2	1	2	2	2	2	2
GHKHK1M20	0.0959599	4	4	Y	Y	Y	1	1	2	2	2	2	2	2	2	2	2	2	2	2	2	2	2	2	2	2	1	1	1	1	2	2	1	1	1	1	2	2	2	2	2	2	2	2	2	2
GHKHK1M21	0.0925794	3	3	N	Y	S	2	2	2	2	2	2	1	1	1	1	1	1	1	1	1	1	1	1	1	2	2	2	1	1	1	1	1	1	2	2	1	1	1	1	1	1	1	1	1	1
GHKHK1M22	0.112709	2	2	N	Y	Y	2	2	2	2	2	2	2	2	2	2	2	1	1	*	1	1	1	1	1	2	2	2	2	2	2	2	2	2	1	1	2	2	*	1	1	1	1	1	1	1
GHKHK1M23	0	2	2	N	Y	Y	1	1	2	2	1	1	1	1	1	1	2	2	1	1	1	1	1	1	1	1	1	1	1	1	1	1	1	1	1	1	2	2	1	1	1	1	1	1	1	1
GHKHK1M24	0.0873851	3	3	N	Y	Y	2	2	2	2	2	2	2	2	2	2	2	2	2	2	2	2	2	2	2	1	1	1	2	1	1	1	1	1	1	1	1	1	1	1	1	1	1	1	1	1
GHKHK1M25	0	2	2	N	S	L	1	1	*	1	1	1	1	1	1	1	2	1	1	1	1	1	1	1	1	1	1	1	2	2	2	2	2	2	2	2	1	1	1	1	1	1	1	1	1	1
GHKHK1M26	0	.	.	.	.	.	1	1	1	1	1	1	2	2	2	2	2	2	2	2	2	2	2	1	1	1	1	1	1	*	1	1	1	1	1	1	2	2	2	2	2	2	2	2	2	1
GHKHK1M27	.	4	4	Y	Y	S	2	2	2	2	2	2	2	2	2	2	1	2	2	2	2	2	2	2	2	1	1	1	1	2	2	2	2	2	2	1	1	1	1	1	1	1	1	1	1	1
GHKHK1M28	0.103402	3	3	N	Y	Y	2	2	2	2	2	2	2	2	2	2	2	2	2	2	2	2	1	1	1	2	2	2	1	1	1	1	1	1	1	1	2	2	2	2	2	2	2	1	2	2
GHKHK1M29	0.096807	4	4	Y	Y	Y	2	2	2	2	2	2	2	1	1	1	1	1	1	1	1	1	1	1	1	2	2	2	2	1	1	1	1	1	1	1	2	2	2	2	2	2	2	2	2	2
GHKHK1M30	0.0826331	4	4	Y	Y	Y	2	2	2	2	2	2	2	2	2	2	2	2	2	2	2	2	2	2	2	1	1	1	1	2	2	2	2	2	2	2	1	1	1	1	1	1	1	1	1	1
GHKHK1M31	0.0786936	2	2	N	Y	Y	1	1	1	1	1	2	2	2	2	2	1	1	2	2	2	2	2	2	2	1	1	1	1	2	2	2	1	1	1	1	1	1	1	1	1	1	1	1	2	2
GHKHK1M32	0.0886398	3	3	N	Y	S	2	2	2	2	2	2	2	2	2	2	2	1	1	1	1	2	2	2	2	2	1	1	1	2	2	2	2	2	2	2	1	1	1	1	1	1	1	1	1	1
GHKHK1M33	0.0976708	3	3	N	Y	L	2	2	2	2	2	2	2	2	2	2	2	1	1	1	2	1	2	2	2	2	2	2	2	2	2	2	2	2	2	2	1	1	1	1	1	1	1	1	1	1
GHKHK1M34	0.0889007	2	2	N	Y	S	2	2	2	2	2	2	2	2	2	2	1	2	1	1	1	1	1	1	1	2	2	2	2	1	1	1	1	1	1	1	1	1	1	1	1	1	1	*	1	1
GHKHK1M35	0.104465	4	4	Y	Y	Y	2	2	2	1	2	2	2	2	2	2	2	2	2	2	2	2	2	2	2	2	2	2	2	2	2	2	1	1	1	1	2	1	1	1	2	1	2	1	2	2
GHKHK1M36	0	3	3	Y	Y	L	2	2	1	1	1	1	1	1	1	1	1	2	2	2	2	2	2	2	2	1	1	1	1	1	1	1	1	1	1	1	1	1	1	1	1	1	1	1	1	1
GHKHK1M37	0	2	2	N	Y	Y	1	1	1	1	1	1	1	1	1	1	1	2	2	2	2	2	2	2	2	2	2	1	1	2	2	2	1	1	1	1	1	1	1	1	1	1	1	1	1	1
GHKHK1M38	0.0957109	3	3	Y	Y	Y	2	2	2	2	2	2	2	2	2	2	2	1	1	1	1	1	1	1	1	2	2	1	1	1	2	2	2	2	2	2	1	1	2	2	2	2	2	2	2	2
GHKHK1M39	0	4	4	Y	Y	Y	1	1	1	1	1	2	2	2	2	1	2	2	2	2	2	2	2	2	2	2	2	1	1	1	1	1	1	1	1	1	1	1	1	1	1	1	1	1	2	1
GHKHK1M40	0	1	1	N	N	N	1	1	1	1	1	1	1	1	1	1	1	1	1	*	*	1	1	1	1	1	1	1	2	2	2	2	2	2	2	2	2	2	2	2	2	2	2	2	2	1
GHKHK1M41	0	2	2	N	Y	L	2	2	1	1	1	1	1	1	1	1	1	1	1	1	1	1	1	2	1	2	2	2	2	2	2	2	2	2	2	2	2	2	2	2	2	2	2	2	2	2
GHKHK1M42	0.0764974	4	4	Y	Y	Y	2	2	2	2	2	2	2	2	2	2	2	1	1	1	1	1	1	1	1	1	1	1	2	2	2	2	2	2	2	2	1	1	1	1	1	1	1	1	1	1
GHKHK1M43	0.0830141	2	2	N	Y	Y	2	2	2	2	2	2	2	2	2	2	2	1	1	1	1	1	1	1	1	1	1	1	1	2	2	2	2	2	2	2	2	2	2	2	2	2	2	2	2	1
GHKHK1M44	0	1	1	N	N	N	1	2	1	1	1	1	1	1	1	1	1	1	1	2	2	2	2	2	2	1	1	1	1	1	1	1	1	1	2	2	1	1	2	1	1	1	1	1	1	2
GHKHK1M45	0	3	3	N	Y	S	1	1	1	1	1	1	1	1	1	1	1	2	2	2	2	2	2	2	2	2	2	1	1	1	1	1	1	1	2	2	1	1	1	1	1	1	1	1	1	1
GHKHK1M46	.	4	4	Y	Y	Y	2	2	2	2	2	2	2	2	2	2	2	2	2	2	2	2	2	2	2	2	2	2	2	1	1	1	1	1	1	1	1	1	1	1	1	1	1	1	1	1
GHKHK1M47	0	3	3	N	Y	S	1	1	1	1	1	1	1	1	1	1	1	2	2	2	2	2	2	2	2	2	2	2	2	1	1	1	1	1	1	1	2	2	2	2	1	2	2	2	2	2
GHKHK1M48	.	3	3	Y	Y	S	2	2	*	2	2	2	2	2	*	2	2	1	1	*	2	2	2	2	2	1	2	1	1	1	*	1	1	*	1	*	1	2	1	1	1	1	1	1	*	1
GHKHK1M49	0.087355	3	3	Y	S	Y	2	2	2	2	2	2	2	2	2	2	2	2	1	1	1	1	1	1	1	1	1	1	1	1	1	1	1	1	1	1	2	2	2	2	2	2	2	2	2	2
GHKHK1M50	0	2	2	N	S	N	2	2	2	2	1	1	1	1	1	1	1	2	1	1	1	1	1	1	1	1	1	1	1	1	1	1	1	1	1	1	1	1	1	1	1	1	1	1	1	1
GHKHK1M51	0	3	3	N	Y	Y	2	2	1	1	1	1	1	1	1	1	1	2	2	2	2	2	2	2	2	1	1	1	2	2	2	2	2	2	2	*	2	2	2	2	2	2	2	2	2	2
GHKHK1M53	0.0952951	4	4	Y	Y	Y	1	1	2	2	2	2	2	2	2	2	2	2	1	1	1	1	1	1	1	1	1	1	1	1	1	1	1	1	1	2	2	2	2	2	2	2	2	2	2	2
GHKHK1M54	0.107272	3	3	N	Y	S	2	2	2	2	2	2	2	2	2	2	2	2	2	2	2	2	2	2	2	2	2	1	1	1	1	1	1	1	1	1	2	2	2	2	2	2	2	2	2	2
GHKHK1M55	0.0879658	2	2	N	S	S	2	2	2	2	2	2	2	*	2	2	2	2	1	1	1	1	1	1	1	1	1	1	1	1	1	1	*	2	2	2	1	1	1	1	1	1	1	1	1	1
GHKHK1M57	0	3	3	Y	Y	S	1	1	1	1	1	1	1	1	1	2	1	2	2	2	2	2	2	2	2	2	2	2	2	2	2	2	2	2	2	2	1	1	1	1	1	1	1	2	1	1
GHKHK1M58	.	4	4	Y	Y	Y	2	2	2	2	2	2	2	2	2	2	2	1	1	1	1	1	1	1	1	1	1	1	1	2	2	2	2	2	2	2	2	2	2	2	2	2	2	2	*	2
GHKHK1M59	.	3	3	Y	Y	L	2	1	*	2	2	*	*	*	*	1	1	*	1	*	1	2	2	2	2	2	2	2	2	1	*	*	1	*	1	*	2	2	2	2	2	1	1	2	*	2
GHKHK1M60	0.0873425	3	3	Y	Y	S	2	2	2	2	2	2	2	2	2	2	2	1	1	1	1	1	1	1	1	2	2	1	1	2	2	2	1	1	1	1	1	1	1	1	1	1	1	1	1	1
GHKHK1M61	0	3	3	Y	Y	L	1	2	1	1	1	1	1	1	1	1	1	2	2	2	2	2	2	2	2	1	1	1	1	2	2	2	2	2	2	*	1	1	1	1	1	1	1	1	1	1

## Sheet: gun backcross
IndLabel Genotypes-1 represents hemizygote for ele allele or heterozygote; 2 represents hemizygote or homozygote for gun allele
gunungcola backcross - 1st letters of individual name (HK or G) indicates cytological orgin (maternal grandmother); HK = elegans HK; G = gunungcola
no	MeanWS	courtship	2w_display	circling	abd_shaking	cac	sl	dy	crl	y	Moe	Tbh	os	up	CG2658	tan	aaNAT2	yellow_c	Ddc	b	Btk29A	tim	al	ed	aaNAT1	Bc	DAT	EcR	yellow_k	Clk	ple	Baldspot	araucan	bab1	yellow_g	tsl	DopR2	fru	H	DopR1	CG11943	yellow_e	TFIIA-L	ebony	spin
HKGG1M03	0	1	N	N	N	2	2	2	2	2	2	2	2	2	2	2	1	2	1	1	1	1	1	1	1	1	1	1	2	1	2	2	1	1	1	1	1	1	1	1	1	1	1	1	1
HKGG1M04	0	1	N	N	N	2	2	2	2	2	2	2	2	2	2	2	1	2	2	2	2	2	2	2	2	2	2	2	1	1	1	1	2	2	2	2	2	1	2	1	1	1	1	1	1
HKGG1M05	0	1	N	N	N	2	2	2	2	2	2	2	2	2	2	2	2	2	2	2	2	2	2	2	1	1	1	1	1	1	1	1	1	1	2	1	1	1	1	1	1	1	1	1	1
HKGG1M06	0	1	N	N	N	1	1	1	1	1	1	1	2	2	2	2	1	1	1	1	1	1	1	1	2	2	2	2	2	2	2	1	1	1	1	2	2	2	2	2	2	2	2	2	2
HKGG1M07	0.051521	2	N	N	L	1	1	*	1	1	1	1	1	*	1	1	2	2	1	1	1	1	1	1	2	1	1	1	2	*	2	*	2	2	*	1	1	1	1	1	1	1	1	1	1
HKGG1M08	0.0609348	3	Y	Y	Y	1	1	1	1	1	1	1	1	2	1	1	2	1	1	1	1	1	1	1	1	1	1	1	1	1	1	1	1	1	1	2	2	2	2	2	2	2	2	2	2
HKGG1M09	0.055982	2	N	N	Y	2	2	1	1	1	1	1	1	1	1	1	2	1	1	1	1	1	1	1	1	1	1	1	2	2	2	2	2	2	2	1	1	1	1	1	1	1	1	1	1
HKGG1M10	0.0580393	2	N	S	Y	1	1	1	1	1	2	2	2	2	2	2	2	2	2	2	2	2	2	2	2	2	2	2	1	1	1	1	1	1	1	1	1	1	1	1	1	1	1	1	1
HKGG1M11	0	1	N	N	N	2	2	2	2	2	2	2	2	2	2	2	1	1	1	1	1	1	1	1	2	2	1	1	1	1	1	1	1	1	2	1	1	1	1	1	1	1	1	1	1
HKGG1M12	0.058648	2	N	S	S	2	2	1	1	1	1	1	1	2	1	1	2	1	1	1	1	1	1	1	1	1	2	2	1	1	1	1	1	2	2	1	1	1	1	1	1	1	1	1	1
HKGG1M13	0	1	N	N	S	1	1	1	1	2	2	2	2	2	2	2	2	2	2	2	2	2	2	2	1	1	1	2	1	1	2	2	2	2	2	1	1	1	1	1	1	1	1	1	1
HKGG1M14	0.0197123	3	N	Y	L	1	1	1	1	1	1	*	1	2	2	2	1	1	1	1	1	1	1	1	2	2	2	1	1	1	1	2	1	2	*	1	1	1	1	1	1	1	1	1	1
HKGG1M15	0.0748471	2	N	S	S	1	1	*	1	1	1	1	1	*	1	1	1	1	*	1	1	1	1	1	1	1	2	2	1	1	1	1	1	1	*	1	1	1	1	1	1	1	2	1	2
HKGG1M16	0.060573	2	N	S	N	1	2	2	1	1	1	2	2	2	2	2	2	2	2	2	2	2	2	2	2	1	1	1	1	1	1	2	2	2	2	1	1	1	1	1	1	1	1	1	1
HKGG1M17	0.0597851	1	N	N	N	1	1	2	2	1	1	1	1	1	1	1	1	1	1	1	1	1	1	1	1	1	1	1	1	1	1	2	2	2	2	2	2	2	2	2	2	2	2	2	2
HKGG1M18	0	2	N	S	L	2	2	1	1	1	1	1	1	1	2	2	2	2	*	2	2	2	2	2	1	1	1	1	2	*	2	2	2	2	*	1	1	1	1	1	1	1	1	1	1
HKGG1M19	0.0477433	2	N	Y	L	1	1	1	1	1	1	1	*	1	1	1	1	1	*	*	2	2	2	2	2	2	2	2	1	1	1	1	2	1	*	1	1	1	1	1	1	2	2	1	1
HKGG1M20	0	3	N	Y	L	1	1	1	2	2	2	2	2	2	2	2	1	2	2	2	2	2	2	2	1	1	2	2	1	1	1	1	1	2	2	2	2	2	2	2	2	2	2	2	2
HKGG1M21	0	1	N	N	N	2	2	2	2	2	2	2	1	1	1	1	1	1	*	1	1	1	1	1	2	2	2	2	1	1	1	1	*	1	*	2	2	2	2	2	2	2	2	2	2
HKGG1M22	0	2	N	S	N	2	2	2	2	2	2	2	2	2	2	2	2	2	1	1	1	1	1	1	2	2	1	1	2	2	2	1	1	1	1	1	1	1	1	1	1	1	1	1	1
HKGG1M23	0.037872	2	Y	S	L	1	1	1	1	1	1	1	1	1	1	1	1	1	1	1	1	1	1	1	2	2	2	2	1	1	1	2	2	2	2	1	1	1	1	1	1	1	1	1	1
HKGG1M24	0.0353409	3	Y	Y	S	1	1	1	1	1	1	1	1	2	1	1	1	1	1	1	1	1	1	1	2	2	1	2	2	2	2	2	2	2	2	1	1	1	1	1	1	1	1	1	1
HKGG1M25	0	2	N	Y	S	2	2	2	2	2	2	2	2	2	2	2	1	2	2	2	2	2	2	2	1	1	1	1	1	1	1	1	1	1	1	1	1	1	1	1	1	1	1	1	1
HKGG1M27	0.0668702	2	N	N	S	2	2	1	1	1	1	1	1	2	1	1	1	1	1	1	1	1	1	1	1	1	1	1	1	1	1	2	2	2	2	1	1	1	1	1	1	1	1	1	1
HKGG1M28	0	2	N	N	S	2	1	2	2	2	2	2	2	2	2	2	1	1	1	1	1	1	1	1	2	2	2	2	1	1	1	1	1	1	1	1	1	1	1	1	1	1	1	1	1
HKGG1M29	0.0575963	3	N	Y	Y	1	1	1	1	1	1	1	1	2	1	1	1	1	1	1	1	1	1	1	2	2	2	2	1	1	1	1	2	2	2	1	1	1	1	1	1	1	1	1	1
HKGG1M30	0	2	N	S	L	2	2	2	2	2	2	2	2	2	2	2	1	1	1	1	1	1	1	1	1	1	1	2	2	2	2	2	2	2	2	1	1	1	1	1	1	1	1	1	1
HKGG1M31	0	.	.	.	.	2	2	2	2	2	2	2	2	2	1	1	2	2	2	1	1	1	1	1	1	1	1	1	1	1	1	2	2	2	2	1	1	1	1	1	1	1	1	1	1
HKGG1M32	0	.	.	.	.	1	1	1	1	1	1	1	1	2	1	1	1	1	1	1	1	1	1	1	1	1	1	1	1	2	2	2	2	1	1	1	1	1	1	1	1	1	1	1	1
HKGG1M33	0.0694393	3	Y	Y	S	1	1	2	2	2	2	2	2	2	2	2	1	1	1	1	1	1	*	1	1	1	1	1	2	2	2	2	2	2	2	1	1	1	1	1	1	1	1	1	1
HKGG1M34	0.0736641	2	N	S	L	1	1	1	1	1	1	1	1	2	1	1	1	1	1	1	1	1	1	1	1	1	1	1	1	1	1	1	1	1	1	2	2	2	2	2	2	2	2	2	2
HKGG1M35	0	2	N	Y	S	1	1	2	2	2	2	2	2	2	1	1	2	1	1	1	1	1	1	1	1	1	2	2	1	1	1	1	1	1	1	1	1	1	1	1	1	1	1	1	1
HKGG1M36	0	2	N	Y	S	2	2	2	2	2	2	2	2	2	2	1	2	1	1	1	1	1	1	1	1	1	1	1	2	*	2	2	1	1	1	2	2	2	2	2	2	2	2	2	2
HKGG1M37	0	.	.	.	.	2	2	2	2	2	2	2	2	2	1	1	1	1	1	1	1	1	1	1	2	2	2	1	2	2	2	2	2	1	1	2	2	2	2	2	2	2	2	2	2
HKGG1M38	0.0436377	3	N	Y	S	1	1	1	1	1	1	1	1	2	2	2	1	1	2	2	2	2	2	2	1	1	1	1	1	1	1	1	1	1	1	1	1	1	1	1	1	1	1	1	1
HKGG1M39	0.0457464	1	N	N	N	2	2	2	1	1	1	1	1	2	1	1	1	1	1	1	2	1	1	1	1	1	1	1	1	2	2	2	2	2	2	2	2	2	2	2	2	2	2	2	2
HKGG2M01	0	2	N	Y	S	1	1	1	1	2	2	2	2	2	2	2	1	2	2	2	2	2	2	2	1	1	1	1	1	1	1	1	1	1	1	1	1	1	1	1	1	1	1	1	1
HKGG2M02	0	.	.	.	.	1	1	2	2	2	*	2	2	2	1	*	1	2	2	2	2	2	2	2	2	2	2	2	1	1	1	2	2	1	*	1	1	1	1	1	1	1	1	1	1
HKGG2M03	0.0742849	.	.	.	.	1	2	1	1	1	1	1	1	1	2	1	1	1	1	1	1	1	1	1	1	1	1	1	2	2	2	2	2	2	2	1	1	1	1	1	1	1	1	1	1
HKGG2M04	0.0799838	3	Y	Y	S	1	1	1	1	1	1	1	1	1	2	1	1	1	1	1	1	1	1	1	1	1	1	1	1	1	1	1	1	1	1	1	1	1	1	1	1	1	1	1	1
HKGG2M05	0	1	N	N	N	2	2	2	2	2	2	2	2	2	1	1	2	1	1	1	1	1	1	1	1	2	2	2	2	2	2	2	2	2	2	2	2	2	2	2	2	2	2	2	2
HKGG2M06	0.0510616	1	N	N	N	1	1	1	1	1	1	1	1	1	1	1	2	2	2	2	2	2	2	2	2	1	1	1	1	1	1	2	2	2	2	1	1	2	2	2	2	2	2	2	2
HKGG2M07	-	1	N	N	N	1	1	1	1	*	*	1	1	1	1	1	2	1	1	1	1	*	1	2	2	2	2	2	2	*	1	1	*	1	*	1	1	1	2	1	1	1	1	1	1
HKGG2M08	0	1	N	N	N	2	2	2	2	2	2	2	2	2	2	2	1	2	2	2	2	2	2	2	2	2	2	2	2	2	2	2	2	2	2	1	1	2	2	2	2	2	2	2	2
HKGG2M09	0	2	N	S	L	1	1	1	1	1	1	1	1	1	1	1	1	1	1	1	2	2	2	2	1	1	1	1	1	1	1	1	1	1	1	2	2	2	2	2	2	2	2	2	2
HKGG2M10	0	.	.	.	.	2	2	2	2	2	2	2	1	1	1	1	1	2	1	2	2	2	2	2	1	1	1	2	2	*	2	2	2	2	1	2	2	2	2	2	2	2	2	2	2
HKGG2M11	0	3	Y	S	L	2	2	2	2	2	2	2	2	2	2	2	1	1	1	1	1	1	1	1	1	1	1	1	2	2	2	2	2	2	2	1	1	1	1	1	1	1	1	1	1
HKGG2M12	0	2	N	Y	L	2	2	2	2	2	2	2	2	2	2	2	2	2	2	2	2	2	2	2	1	1	1	1	1	1	1	1	1	1	1	1	1	1	1	1	1	1	1	1	1
HKGG2M13	0	2	N	S	N	2	2	2	2	2	2	2	2	2	2	2	1	1	1	1	1	1	1	1	1	1	1	1	2	2	2	2	2	2	2	2	2	2	2	2	2	2	2	2	2
HKGG2M14	0	2	N	S	L	2	2	2	2	2	2	2	2	2	2	2	2	1	1	1	1	1	1	1	1	1	1	1	2	2	2	2	2	2	2	2	2	1	1	1	1	1	1	1	1
HKGG2M15	-	1	N	.	N	2	2	2	1	1	1	1	1	1	1	1	1	1	1	1	1	1	1	1	1	1	1	1	2	2	2	2	2	2	2	1	1	1	1	1	1	1	1	1	1
HKGG2M16	0	1	N	N	N	2	2	2	2	2	2	2	2	2	1	2	1	2	2	2	2	2	2	2	2	2	2	2	1	1	1	1	1	1	1	2	2	2	2	2	2	2	2	2	2
HKGG2M17	0.0459917	1	N	N	N	1	1	1	1	1	1	1	1	1	1	1	2	2	2	2	2	2	2	2	2	2	2	2	1	1	1	1	1	1	1	2	2	2	2	2	2	2	2	2	2
HKGG2M18	0	2	N	S	N	1	1	2	2	2	2	2	2	2	2	2	*	2	1	1	1	1	1	1	1	1	1	1	2	2	2	1	1	1	2	2	2	2	2	2	2	2	2	2	2
HKGG2M19	0	2	N	Y	L	2	2	2	2	2	2	2	2	2	2	2	2	2	2	1	2	1	1	1	1	1	1	1	1	1	1	1	1	1	1	2	2	2	2	2	2	2	2	2	2
HKGG2M20	0.0546284	2	N	S	L	1	1	1	1	1	1	1	1	1	1	1	1	1	1	1	1	1	1	1	1	1	1	1	2	2	2	2	2	2	2	2	2	2	2	2	2	2	2	2	2
HKGG2M21	0	1	N	N	N	2	2	2	2	2	2	2	2	2	2	2	2	1	1	1	1	1	1	1	1	1	1	1	1	1	1	2	2	2	2	2	2	2	2	2	2	2	2	2	1
HKGG2M22	0	1	N	N	N	2	2	2	2	2	2	2	2	2	2	2	1	1	1	1	2	1	1	1	1	2	2	2	1	1	1	1	1	2	2	2	2	1	1	1	1	1	1	1	1
HKGG2M23	0	1	N	N	N	2	2	2	2	2	2	2	2	2	2	2	2	1	1	1	1	1	1	1	2	2	2	2	2	2	2	1	1	1	1	1	1	1	1	1	1	1	1	1	1
HKGG2M24	0	2	N	N	L	2	2	2	2	2	2	2	2	2	2	2	1	2	2	2	2	2	2	2	2	2	2	2	1	1	1	1	1	2	1	2	2	1	1	1	1	1	1	1	1
HKGG2M25	0.0485946	1	N	N	N	1	1	1	1	1	1	1	1	1	1	1	2	2	2	2	2	2	2	2	2	2	2	2	1	1	1	1	1	1	1	2	2	2	2	2	2	2	2	2	2
HKGG2M26	0.0637199	1	N	N	N	1	1	1	1	1	1	1	1	1	1	1	2	2	2	2	2	2	2	2	1	1	2	2	2	2	2	1	1	1	1	1	1	1	1	1	1	1	1	1	1
HKGG2M27	0.0605443	3	Y	Y	S	1	1	1	1	1	1	2	2	2	2	2	1	1	1	1	1	1	1	1	1	1	1	1	2	2	2	1	1	1	1	2	2	2	2	2	2	2	2	2	2
HKGG2M28	0.0571561	1	N	S	N	1	1	1	1	1	1	1	1	1	1	1	1	2	2	2	1	1	1	1	1	1	1	1	2	2	2	2	2	2	2	1	1	1	1	1	1	1	1	1	1
HKGG2M29	0	2	N	Y	L	1	1	1	1	2	2	2	2	2	2	2	1	1	*	1	1	1	1	*	2	2	2	2	1	*	1	1	2	2	2	1	1	*	1	1	1	1	1	1	1
HKGG2M30	0	3	Y	.	L	2	2	2	2	2	2	2	2	2	2	2	1	1	1	1	1	1	1	1	1	2	2	2	1	2	2	2	2	2	2	2	2	2	2	2	2	2	2	2	2
HKGG2M31	0	1	N	N	N	2	2	2	2	2	2	2	2	2	2	2	1	2	2	2	2	2	2	2	2	2	2	2	1	1	1	1	1	2	2	2	2	2	2	2	2	2	2	2	2
HKGG2M32	0	2	N	S	L	2	2	2	2	2	2	2	2	2	2	2	1	1	1	1	1	1	1	1	1	1	1	1	2	2	2	2	2	2	2	2	2	2	2	2	2	2	2	2	2
HKGG2M33	0	2	N	Y	L	2	2	2	2	2	2	2	2	2	2	2	1	1	2	2	2	2	2	2	1	1	1	1	1	1	1	1	1	1	1	1	1	1	1	1	1	1	1	1	1
HKGG2M34	0	2	N	Y	L	2	2	2	2	2	2	2	2	2	2	2	1	1	2	2	2	2	2	2	1	1	1	2	2	2	2	2	2	1	*	2	2	1	1	1	2	1	1	1	1
HKGG2M35	0	1	Y	.	L	2	2	2	2	2	2	2	2	2	2	2	2	2	2	2	2	2	2	2	1	1	1	1	1	1	1	1	1	1	1	1	1	1	1	1	2	1	1	1	1
HKGG2M36	0.0754805	2	N	S	L	1	1	1	1	1	1	1	1	1	1	1	1	2	2	2	1	1	1	1	1	1	1	1	1	1	1	1	1	1	1	2	2	1	1	1	1	1	1	1	1
GHKG1M01	0	1	N	N	N	2	2	2	2	2	2	2	2	2	2	2	1	1	2	2	2	2	2	2	1	1	1	1	2	2	2	2	2	2	2	1	1	2	1	1	1	1	1	1	1
GHKG1M02	0	1	N	N	N	2	2	2	2	2	1	1	1	1	1	1	2	2	2	2	2	2	2	2	2	2	2	1	2	2	2	2	2	2	2	1	1	2	2	2	2	2	2	2	2
GHKG1M03	0	1	N	N	N	2	2	2	2	2	2	2	2	2	2	2	1	1	1	1	1	1	1	1	2	2	2	1	2	2	2	2	2	2	2	2	2	2	2	2	1	2	2	1	1
GHKG1M04	0	2	N	N	L	2	2	2	2	2	2	2	2	2	2	2	2	1	1	1	1	1	1	1	1	1	1	1	1	1	1	1	1	1	2	2	2	1	1	1	2	1	1	*	1
GHKG1M05	0.0989586	3	Y	Y	L	2	2	1	1	1	1	1	1	1	1	1	1	1	1	1	1	1	1	1	1	1	1	1	1	1	1	1	1	1	1	2	1	1	1	1	2	1	1	1	1
GHKG1M06	0	2	N	N	N	2	2	2	2	2	2	2	2	2	2	2	1	1	1	1	2	1	1	1	2	2	2	2	1	1	1	1	2	1	2	2	2	2	2	2	1	2	2	*	2
GHKG1M07	-	1	N	N	N	2	2	2	2	1	1	1	1	1	1	1	2	2	2	1	1	1	1	1	2	2	2	2	2	2	2	1	1	1	1	2	2	2	2	2	1	2	2	*	2
GHKG1M08	0.0828637	4	Y	Y	Y	1	1	1	1	1	1	1	1	1	1	1	1	1	1	*	2	1	1	1	1	1	1	1	1	1	1	1	1	1	1	1	1	1	1	1	1	1	1	1	1
GHKG1M09	0	3	Y	Y	L	2	2	2	2	2	2	2	2	2	2	2	1	1	1	1	2	1	1	1	1	1	1	1	2	2	2	2	2	2	2	1	1	1	1	1	1	1	1	1	1
GHKG1M10	-	1	N	N	N	2	2	2	1	*	1	1	1	1	1	1	1	2	2	2	2	2	2	2	2	2	2	2	1	1	1	1	2	2	*	2	2	*	2	2	2	2	2	1	2
GHKG1M11	-	2.5	Y	S	N	1	1	1	1	1	1	1	1	2	2	2	1	1	1	1	1	1	1	1	2	2	2	2	1	1	1	1	2	1	2	2	2	1	1	2	2	1	1	*	2
GHKG1M12	0	2	N	S	L	2	2	2	2	2	2	2	1	1	1	1	1	2	2	2	2	2	2	2	1	1	1	1	1	1	1	2	2	2	2	2	2	2	2	2	1	2	2	2	2
GHKG1M13	0.0718002	2	N	Y	N	1	1	1	1	1	1	1	1	1	1	1	2	1	1	1	1	1	1	1	1	1	1	1	1	1	1	1	1	1	2	2	2	2	2	2	1	2	2	2	2
GHKG1M14	-	1	N	N	N	2	1	*	2	*	1	2	1	2	2	1	2	1	1	1	1	1	1	1	1	1	1	2	1	1	1	1	1	1	1	2	2	1	1	1	2	1	2	*	1
GHKG1M15	0.0396077	1	N	N	N	1	1	1	1	1	1	1	2	2	2	2	1	1	1	1	1	2	2	2	2	2	2	2	1	1	1	2	2	2	2	1	1	1	1	1	1	1	2	1	1
GHKG1M16	0.08817	2	N	S	L	1	1	1	1	1	1	1	1	1	1	1	1	1	1	1	1	1	1	1	1	1	1	1	2	2	2	2	2	2	2	1	1	1	1	1	1	1	1	1	1
GHKG1M17	0.0760241	2	N	Y	L	1	1	1	1	1	1	1	1	1	1	1	1	1	1	2	2	2	2	2	1	1	1	1	1	1	1	1	1	1	1	1	1	1	1	1	1	1	1	1	2
GHKG1M18	0	2	N	Y	Y	2	2	2	2	2	2	2	1	2	2	2	1	1	1	1	1	1	1	1	1	1	1	1	1	1	1	1	1	1	1	1	*	1	1	1	1	1	1	1	1
GHKG1M19	0.0680704	2	N	Y	L	1	1	1	1	1	1	1	1	1	1	1	2	2	1	1	1	1	1	1	1	1	1	1	1	1	1	1	1	1	1	2	2	2	2	2	2	2	2	2	2
GHKG1M20	0	2	N	N	L	2	2	2	2	2	2	2	2	2	2	2	2	2	2	2	2	2	2	2	1	1	1	1	1	1	1	1	1	2	2	1	1	1	1	1	1	1	1	1	1
GHKG1M21	0	1	N	N	N	1	1	1	1	1	1	1	1	1	1	1	2	2	2	2	2	2	2	2	2	2	2	1	1	2	2	2	2	2	2	2	2	2	2	2	2	2	2	2	2
GHKG1M22	0	1.5	N	S	L	1	1	2	2	2	2	1	1	1	1	1	2	2	2	2	2	2	2	2	1	1	1	1	1	1	1	1	1	1	2	1	1	1	1	1	1	1	1	1	1
GHKG1M23	0.0590648	2	N	Y	S	1	1	1	1	1	1	1	1	1	1	1	1	1	1	1	1	1	1	2	2	2	1	1	1	1	1	1	1	1	1	1	1	1	1	1	1	1	1	1	1
GHKG1M24	0.0616696	3	N	Y	Y	1	1	1	1	1	1	1	1	1	1	2	1	1	1	1	1	1	1	1	1	1	1	1	1	1	1	1	1	1	1	1	1	1	1	1	1	1	1	1	1
GHKG1M25	0	1.5	N	S	L	2	2	2	2	2	2	2	2	2	2	2	1	1	1	1	1	1	1	1	1	1	1	1	2	2	2	2	2	1	1	2	2	2	2	2	2	2	2	2	2
GHKG1M26	-	3	Y	Y	S	1	1	*	1	1	1	1	1	*	1	1	2	1	*	1	1	*	*	1	1	1	1	1	2	*	*	2	2	2	*	1	2	1	1	1	1	1	2	*	2
GHKG1M27	0	1	N	N	L	1	1	1	1	1	2	2	2	2	2	2	2	2	2	1	1	1	1	1	2	2	2	2	1	1	1	1	1	1	2	2	2	2	2	2	2	2	2	2	2
GHKG1M28	0	1	N	N	N	2	2	2	2	2	2	2	2	2	2	2	1	1	2	1	1	1	1	1	2	2	2	2	2	2	2	2	2	2	2	2	2	2	2	2	2	2	2	2	2
GHKG1M29	0	2	N	Y	L	2	2	2	2	2	2	2	2	2	2	2	1	1	1	1	1	1	1	1	1	1	1	1	1	1	1	1	1	1	1	2	2	2	2	2	2	2	2	2	2
GHKG1M30	0.0397535	3	Y	S	S	1	1	1	1	1	1	1	1	1	1	2	1	1	1	1	1	1	1	1	1	1	1	1	1	1	1	1	1	1	1	1	1	1	1	1	1	1	1	1	1
GHKG1M31	0	1	N	Y	N	2	2	2	2	2	2	2	2	2	1	1	1	1	1	1	1	1	1	1	1	1	1	2	1	1	1	1	1	1	1	1	1	1	1	1	1	1	1	1	1
GHKG1M32	0	1	N	N	N	2	2	2	2	2	2	2	2	2	2	2	2	2	2	2	2	2	2	2	2	2	2	2	2	2	2	2	2	2	2	1	1	1	1	1	1	1	1	1	1
GHKG1M33	0	2	N	Y	L	2	2	2	2	2	2	2	2	2	1	1	1	1	1	1	1	2	2	2	1	2	1	1	1	1	1	1	1	1	1	1	1	1	1	1	1	1	1	1	1
GHKG1M34	-	2	N	Y	L	1	1	*	1	*	1	1	1	1	2	1	2	2	2	2	2	2	2	2	2	2	1	1	2	*	2	2	2	2	*	1	1	2	1	1	1	1	1	1	1
GHKG1M35	0	1	N	N	N	1	1	2	2	2	2	2	2	2	2	2	1	1	1	1	1	1	1	1	2	2	2	2	2	2	2	2	2	2	2	2	2	2	2	2	2	2	2	2	2
GHKG1M36	0	2	Y	Y	L	2	2	2	2	2	2	2	2	2	2	2	1	1	1	1	1	2	2	2	1	1	1	1	2	2	2	1	1	1	1	1	1	1	1	1	1	1	1	1	1
GHKG1M37	0.054397	2	N	N	N	2	2	2	2	1	1	1	1	1	1	1	1	1	1	1	1	1	1	1	2	2	2	1	1	1	1	1	1	1	1	2	2	2	2	2	2	2	2	2	2
GHKG1M38	0.0461619	2	N	S	L	2	2	1	1	1	1	1	1	1	1	1	1	2	2	2	2	2	2	2	1	1	1	1	1	1	1	1	1	1	1	2	2	2	2	2	2	2	2	2	2
GHKG1M39	0	2	N	Y	L	1	1	1	1	2	2	2	2	2	2	2	1	1	1	2	2	2	2	2	1	1	1	1	2	2	2	2	2	2	2	1	1	1	1	1	1	1	1	1	1
